# Supplementary material
Source: publisher site journal article supplement (https://www.spandidos-publications.com/8182/downloadSupplementary)
Supplement: Supplementary file 1 [file downloadSupplementary]

## Sheet: Sheet1
Table SVI. GSVA score of Hallmarks pathway in TCGA cohort.
ID	HALLMARK_TNFA_SIGNALING_VIA_NFKB	HALLMARK_HYPOXIA	HALLMARK_CHOLESTEROL_HOMEOSTASIS	HALLMARK_MITOTIC_SPINDLE	HALLMARK_WNT_BETA_CATENIN_SIGNALING	HALLMARK_TGF_BETA_SIGNALING	HALLMARK_IL6_JAK_STAT3_SIGNALING	HALLMARK_DNA_REPAIR	HALLMARK_G2M_CHECKPOINT	HALLMARK_APOPTOSIS	HALLMARK_NOTCH_SIGNALING	HALLMARK_ADIPOGENESIS	HALLMARK_ESTROGEN_RESPONSE_EARLY	HALLMARK_ESTROGEN_RESPONSE_LATE	HALLMARK_ANDROGEN_RESPONSE	HALLMARK_MYOGENESIS	HALLMARK_PROTEIN_SECRETION	HALLMARK_INTERFERON_ALPHA_RESPONSE	HALLMARK_INTERFERON_GAMMA_RESPONSE	HALLMARK_APICAL_JUNCTION	HALLMARK_APICAL_SURFACE	HALLMARK_HEDGEHOG_SIGNALING	HALLMARK_COMPLEMENT	HALLMARK_UNFOLDED_PROTEIN_RESPONSE	HALLMARK_PI3K_AKT_MTOR_SIGNALING	HALLMARK_MTORC1_SIGNALING	HALLMARK_E2F_TARGETS	HALLMARK_MYC_TARGETS_V1	HALLMARK_MYC_TARGETS_V2	HALLMARK_EPITHELIAL_MESENCHYMAL_TRANSITION	HALLMARK_INFLAMMATORY_RESPONSE	HALLMARK_XENOBIOTIC_METABOLISM	HALLMARK_FATTY_ACID_METABOLISM	HALLMARK_OXIDATIVE_PHOSPHORYLATION	HALLMARK_GLYCOLYSIS	HALLMARK_REACTIVE_OXYGEN_SPECIES_PATHWAY	HALLMARK_P53_PATHWAY	HALLMARK_UV_RESPONSE_UP	HALLMARK_UV_RESPONSE_DN	HALLMARK_ANGIOGENESIS	HALLMARK_HEME_METABOLISM	HALLMARK_COAGULATION	HALLMARK_IL2_STAT5_SIGNALING	HALLMARK_BILE_ACID_METABOLISM	HALLMARK_PEROXISOME	HALLMARK_ALLOGRAFT_REJECTION	HALLMARK_SPERMATOGENESIS	HALLMARK_KRAS_SIGNALING_UP	HALLMARK_KRAS_SIGNALING_DN
TCGA-DS-A7WI-01A	0.479085	0.308072	0.477038	-0.365849	-0.155252	-0.220089	0.221591	0.0684767	-0.396983	0.0871161	-0.0240705	0.0860473	0.180481	0.186239	-0.223069	0.266322	-0.369226	0.224686	0.103301	0.135696	0.286719	-0.159887	0.169903	-0.145047	-0.166521	0.160245	-0.315278	0.114797	0.473184	0.107712	0.302277	0.34946	0.225888	0.135089	0.229139	0.223515	0.220485	0.206474	-0.102147	0.117422	-0.153588	0.315242	0.0262147	-0.032593	-0.0173416	0.173412	-0.0589645	0.0920306	0.215918
TCGA-EX-A449-01A	-0.565234	-0.29192	-0.109841	-0.219508	-0.343339	-0.566547	-0.479355	0.143745	-0.102319	-0.342749	-0.334192	0.143593	-0.00845854	-0.0590825	-0.0551989	-0.205284	0.261428	-0.0554086	-0.37379	-0.333186	-0.316419	-0.354625	-0.393149	0.349281	-0.220067	-0.00269971	0.141112	-0.29555	-0.121944	-0.496798	-0.449751	-0.0495941	0.195207	0.303362	0.207204	-0.0649263	-0.396044	-0.227945	-0.427563	-0.439337	-0.000955448	-0.335807	-0.38656	0.215775	0.0204676	-0.484607	0.1296	-0.411573	-0.136464
TCGA-VS-A958-01A	0.176436	-0.00906103	0.0368667	0.29904	-0.219517	-0.253878	0.505608	-0.241332	0.360291	0.0220033	-0.0419412	-0.147468	0.0969533	0.126124	-0.0502057	-0.217191	-0.19665	0.641645	0.574473	-0.105074	0.026368	-0.177815	0.311213	0.251366	0.276323	0.0414857	0.174641	-0.0986233	0.167734	-0.455978	0.425449	-0.0710997	-0.198929	-0.350522	-0.106195	0.140966	0.0517208	0.0309854	-0.386549	-0.361709	0.0774457	-0.136308	0.329152	0.070947	-0.0426536	0.581661	0.0347392	0.090095	0.0386321
TCGA-MY-A5BE-01A	-0.135096	-0.307216	-0.405216	-0.295395	-0.146618	-0.380817	0.357965	0.290588	0.0443027	0.0563127	-0.296985	-0.0185184	-0.406795	-0.311719	-0.322805	-0.21539	-0.316806	0.648701	0.585993	-0.0980376	0.0131539	-0.270412	0.284467	-0.0594145	0.0706021	-0.213199	0.161132	0.253693	-0.0271407	-0.286766	0.231822	0.016197	0.0375333	0.446839	-0.246518	0.378511	-0.149945	-0.0172522	-0.313146	-0.38791	-0.128877	-0.0565634	0.206825	0.0423522	0.0329707	0.593001	-0.0268569	0.00898624	-0.0165714
TCGA-C5-A905-01A	-0.263389	-0.172978	0.106726	0.180771	0.173999	-0.249323	-0.433214	0.162853	0.196708	-0.2792	-0.102537	0.0250572	0.118676	0.0807942	-0.0896037	-0.130683	-0.153374	-0.632675	-0.567783	-0.273939	-0.199361	-0.219701	-0.368839	0.103206	0.0995432	0.102875	0.264271	0.387311	0.601285	-0.538589	-0.36986	-0.166799	0.0582744	0.371131	-0.129373	-0.0603912	0.0959306	-0.00884458	-0.334941	-0.526471	-0.00447156	-0.288235	-0.216301	-0.17189	0.0153581	-0.488017	-0.0396623	-0.363753	0.0989779
TCGA-BI-A0VR-01A	0.584879	0.383216	0.302667	0.186987	0.160851	0.197823	0.442293	-0.178719	0.357987	0.348324	0.150686	0.0664013	0.241077	0.174695	0.352667	0.146062	-0.0812185	0.587804	0.594487	0.146235	0.2336	0.399348	0.315515	0.374458	0.324792	0.431508	0.334572	0.355573	0.445524	0.294605	0.434277	0.209372	0.17033	0.0597122	0.0420135	0.354909	0.37128	0.288506	0.0990744	-0.0165054	0.173153	0.0288124	0.370018	-0.227594	0.000850497	0.522503	0.0582633	0.202169	0.148514
TCGA-FU-A3WB-01A	-0.449757	-0.234991	-0.122338	0.494628	0.273743	0.153781	-0.549611	0.340136	0.641627	-0.110229	-0.115278	0.0862976	-0.167418	-0.0315062	0.0870718	-0.0833022	0.176289	-0.245144	-0.385141	-0.077318	-0.111284	-0.127189	-0.390927	0.179815	0.162772	0.100544	0.687685	0.461374	0.211856	-0.181084	-0.490077	-0.23318	0.193597	0.418743	-0.0413301	-0.0835012	-0.0660339	-0.0267925	0.0932896	-0.446984	0.0188917	-0.377893	-0.350069	-0.165538	0.0128328	-0.527126	0.256841	-0.349141	-0.247351
TCGA-MA-AA41-01A	-0.364371	0.0841041	-0.294751	0.175374	0.243942	-0.205215	-0.0937692	-0.155688	0.476277	-0.230715	0.133557	-0.0468462	-0.264882	-0.157551	-0.341349	-0.0425402	-0.253067	-0.100167	-0.250827	0.050962	0.0372859	0.0470568	-0.127189	0.0576093	0.075771	0.0333646	0.383946	0.401485	0.383603	-0.302903	-0.246983	-0.178067	-0.0434867	0.0502575	0.013414	-0.171077	0.0248825	-0.0414367	-0.213426	0.122023	-0.282094	0.0584558	-0.165519	-0.107727	-0.112143	-0.101177	0.0462946	-0.205244	0.0965751
TCGA-IR-A3LK-01A	0.449868	0.112354	0.259242	0.145429	-0.225296	-0.0887022	0.282442	0.124522	0.450459	0.200213	0.212398	0.214372	-0.0132918	0.0170155	-0.0442219	-0.036254	0.045847	0.265358	0.240004	-0.0353249	0.0163803	-0.103245	0.111601	0.296789	0.0449877	0.328059	0.416977	0.492348	0.422758	-0.321027	0.187855	-0.104147	0.0758356	0.448636	-0.123557	0.107464	0.215165	0.191231	-0.128888	-0.0224525	0.0222871	-0.15469	-0.0293749	-0.147518	0.0457011	0.226927	0.125011	0.00408164	0.166074
TCGA-VS-A952-01A	-0.433673	-0.385364	-0.156528	0.103665	-0.306145	-0.344837	-0.325934	0.037237	-0.0654941	-0.284667	-0.252358	0.0621397	-0.237269	-0.271092	0.116492	-0.302556	0.200191	-0.31839	-0.4044	-0.293964	-0.18289	-0.403712	-0.306488	-0.00105372	-0.00158424	-0.125464	-0.0807477	-0.366034	-0.442303	-0.53416	-0.40967	-0.105874	0.100323	0.0416048	-0.043055	-0.333243	-0.328277	-0.260603	-0.103197	-0.437418	0.00836279	-0.410878	-0.304642	0.145217	-0.00646645	-0.414937	-0.168597	-0.334751	-0.272772
TCGA-EA-A5ZD-01A	0.317623	-0.127714	-0.147967	0.278047	-0.105513	0.193566	0.454299	0.0739339	0.229055	0.30387	0.0626154	0.131052	-0.015998	0.0297572	0.103594	0.0407974	0.277524	0.479366	0.418274	0.259717	-0.0546971	0.00838692	0.327058	0.0517868	0.247645	-0.00221214	0.0600092	-0.307584	-0.615636	0.00314231	0.431744	-0.00229019	-0.0473949	-0.107444	-0.111819	-0.0505266	0.283112	0.0233188	0.15268	0.0033996	0.227061	0.26242	0.138704	-0.0680373	0.122697	0.345291	-0.154368	0.280791	-0.0447866
TCGA-C5-A1MI-01A	-0.342284	-0.255261	0.0212298	0.329517	-0.158167	0.142255	-0.279295	0.0480541	0.376947	-0.324588	0.200188	-0.240113	-0.171734	-0.197599	0.10224	-0.104409	0.0513895	-0.359982	-0.317331	-0.187262	-0.244777	-0.303912	-0.243903	0.0659363	-0.0227741	-0.132267	0.439179	0.227668	-0.0772686	-0.284767	-0.337658	-0.311732	-0.26597	-0.334076	-0.282847	-0.306236	-0.367491	-0.292867	0.166565	-0.287487	-0.0978822	-0.398637	-0.122351	-0.182697	-0.147829	-0.281936	-0.0137226	-0.306216	-0.170129
TCGA-FU-A3YQ-01A	0.439712	-0.0394432	-0.0625388	-0.0457304	0.0092255	0.155433	0.495639	-0.475204	-0.251854	0.132996	0.0896326	-0.221134	0.0707069	-0.0396356	0.00622502	0.056706	-0.154298	0.455201	0.506181	0.259746	0.293825	0.332378	0.365446	-0.283633	-0.036914	-0.159151	-0.361849	-0.485455	-0.573075	0.375509	0.515537	0.061102	-0.177103	-0.496215	-0.240745	-0.366128	-0.0318976	-0.200075	0.305796	0.406078	0.00692734	0.311326	0.321148	-0.031581	-0.18595	0.495751	-0.133997	0.369096	0.211342
TCGA-VS-A9UB-01A	0.173224	-0.041291	-0.293669	0.3004	-0.193072	-0.0491896	0.446633	-0.00650475	0.309965	0.0510571	-0.332439	-0.28042	-0.131544	-0.305223	0.184897	-0.147537	-0.0750506	0.528467	0.550505	0.152358	-0.0118984	0.138896	0.318089	0.267487	0.171359	0.0991596	0.235024	0.197723	0.248936	0.0082703	0.437245	-0.243538	-0.374603	-0.440817	-0.0946062	-0.26624	0.0185997	-0.0493184	0.193703	0.145113	0.196932	-0.109628	0.244878	-0.263213	-0.310031	0.528072	-0.16678	0.11758	-0.0960589
TCGA-C5-A1BM-01A	0.531279	0.170808	0.421432	-0.204344	-0.0711546	0.158723	0.487093	-0.366997	-0.271221	0.222552	0.23938	-0.016039	0.231801	0.181831	0.196998	0.0242484	0.19331	0.557072	0.534409	0.114042	0.152206	0.0414493	0.387622	-0.0785219	0.0798604	0.291159	-0.446425	-0.321314	-0.425565	0.164574	0.530978	0.0793235	-0.062863	-0.385963	0.0075139	0.0165246	0.277151	0.188137	0.0309073	0.133702	-0.0283735	0.311239	0.321479	0.0403896	0.159318	0.508183	-0.128136	0.416356	0.251225
TCGA-C5-A2LY-01A	-0.162977	-0.177598	-0.147676	-0.49334	-0.267135	-0.378629	0.146558	0.190986	-0.317361	-0.0397101	0.0343388	0.107179	-0.2537	-0.0433594	-0.345948	0.0333703	-0.384215	0.559264	0.506207	-0.155279	0.164224	-0.421209	0.2276	-0.133863	-0.249904	-0.129605	-0.0963608	0.0569083	0.260063	-0.292691	0.214675	0.0458144	0.117843	0.217376	-0.153521	0.371495	0.00948394	0.14089	-0.422042	-0.369826	-0.121826	0.147565	0.155579	0.0845293	0.0446313	0.512561	-0.0469282	-0.0302035	0.152013
TCGA-EA-A50E-01A	0.240784	0.28832	0.286786	-0.291267	-0.193086	0.124418	-0.0223162	-0.402887	-0.158518	-0.0524637	0.0733991	0.232083	0.0453833	0.0759452	0.101845	0.284518	-0.149289	-0.572487	-0.415897	0.207622	-0.0808435	0.221495	0.0624404	0.0181482	-0.243577	0.292266	-0.255267	0.123402	0.386845	0.525324	0.130348	0.217399	0.250966	0.254877	0.0470197	0.002669	0.025701	0.0361182	0.224251	0.383835	-0.17575	0.396457	0.212912	-0.068743	0.0234989	-0.0715668	0.133237	0.345966	0.0960589
TCGA-ZJ-AAXU-01A	0.433103	0.398891	0.0313669	-0.298483	0.053039	0.0344012	0.32294	0.160433	0.0964716	0.0689411	-0.458646	-0.0989682	-0.141928	-0.0436145	0.113591	-0.169278	-0.380529	0.417258	0.38969	-0.100427	0.166918	-0.18601	0.0599525	0.349086	0.0884027	0.305946	0.151007	0.520915	0.604697	-0.0764821	0.271237	-0.00680569	0.0715627	0.167956	0.187448	0.281782	0.162249	0.24176	-0.224147	0.0156464	-0.0857381	-0.057898	0.257695	-0.164418	-0.0589787	0.493447	0.0532817	0.0505457	0.133195
TCGA-HM-A6W2-01A	-0.424536	-0.183001	-0.0843359	-0.261596	0.30871	-0.183176	-0.373039	0.088172	-0.276671	-0.283838	-0.0533501	0.0600441	-0.21284	-0.305233	-0.0365535	-0.0993348	0.133125	-0.560747	-0.54847	-0.229264	-0.301567	0.235921	-0.295881	0.348455	-0.158627	-0.0439723	-0.319014	0.279982	0.11058	0.0924383	-0.360339	0.0192644	0.193866	0.355903	0.0232635	-0.0269252	-0.429216	0.0616872	0.0335133	0.177387	-0.0524845	-0.173269	-0.262541	-0.109356	0.106175	-0.365617	-0.0987899	-0.221267	-0.20302
TCGA-C5-A1MQ-01A	0.0782467	0.199485	0.0232507	-0.516018	-0.377736	-0.352272	0.296876	0.0622053	-0.625415	0.107169	-0.0430775	0.0455023	0.0918767	0.0830386	-0.265152	0.326455	-0.315957	0.374558	0.355856	0.0922858	0.177278	-0.320759	0.258678	-0.100072	-0.272995	-0.3128	-0.551166	-0.194888	-0.102548	0.378008	0.324093	0.234263	0.0246114	0.263231	0.0608621	0.211843	-0.0313687	-0.00210121	-0.0289035	0.387393	-0.0802431	0.413392	0.13448	0.104211	-0.0987992	0.441625	-0.152578	0.300064	0.164278
TCGA-C5-A1BE-01B	0.282383	0.354092	0.313581	0.179777	0.0874624	0.360528	-0.0423792	0.177727	0.332388	0.165135	-0.111842	0.0461593	-0.01292	-0.000381797	0.018649	-0.0982259	0.171507	0.520158	0.304263	0.0933445	0.130782	0.27288	-0.12709	0.169037	0.388835	0.290374	0.221181	0.137401	0.204802	0.0151961	0.153845	0.0195007	0.0941565	-0.000145291	0.110503	0.0127777	0.311214	0.261404	0.07884	-0.380913	0.0599651	-0.251136	0.0811782	-0.150766	-0.160393	-0.263717	0.105016	-0.191797	0.0532418
TCGA-VS-A9U7-01A	0.0152985	-0.162453	-0.0698587	-0.174739	-0.16534	-0.408739	0.330495	0.12133	0.0647247	0.0784955	-0.120109	0.0728073	0.0513274	0.166919	-0.329608	0.039207	-0.489799	0.560354	0.490158	-0.1778	0.114673	-0.30182	0.115177	-0.0255488	-0.112157	-0.0887607	0.211642	0.142701	0.121089	-0.320832	0.173123	0.148317	0.167306	0.155777	-0.194856	0.0933026	0.0855058	0.0838829	-0.381888	-0.323102	-0.0407234	0.0604676	0.0325243	-0.0876813	-0.109128	0.404371	0.181955	-0.135468	0.0353499
TCGA-LP-A4AX-01A	0.102927	-0.16793	-0.474513	0.246163	0.0974931	0.137871	0.342115	0.0475806	0.309575	0.0435491	-0.339605	-0.210899	-0.301578	-0.34907	-0.0837877	-0.105506	-0.106831	0.5486	0.504829	0.138044	0.0950585	0.240229	0.26905	0.214095	-0.0097013	-0.163695	0.367411	0.347478	0.462643	0.31319	0.273422	-0.0382166	-0.2705	-0.315087	-0.212604	-0.292549	-0.192431	0.0220173	-0.00554029	0.0518916	-0.128759	0.0731687	0.133028	-0.167879	-0.334633	0.442288	-0.0291451	0.11051	-0.236472
TCGA-JW-A5VH-01A	-0.491375	-0.100857	0.0807071	0.105265	0.459893	0.101534	-0.497167	0.246986	0.355005	-0.221852	0.225936	0.103092	-0.218504	-0.197543	-0.0307704	-0.169876	0.0694358	-0.726456	-0.616688	-0.187391	-0.41761	0.226415	-0.370362	0.336658	0.0117725	0.332884	0.318581	0.543363	0.44287	0.132517	-0.475363	-0.160239	0.0608114	0.323798	0.111272	-0.321479	-0.232659	-0.199261	0.03053	0.202478	0.014748	-0.390599	-0.256968	-0.147263	-0.0244389	-0.56257	0.130804	-0.196242	-0.300992
TCGA-FU-A23L-01A	-0.0013551	-0.261465	-0.220157	-0.25667	-0.113885	-0.296696	0.0558016	-0.246407	-0.337404	0.0186524	-0.168974	-0.220065	-0.125913	-0.272037	-0.149682	-0.00942854	-0.236697	0.465599	0.365658	-0.0120186	0.27412	-0.34276	0.0841902	-0.105334	-0.0495707	-0.280359	-0.352773	-0.360256	-0.317325	-0.320545	0.158018	-0.200742	-0.260904	-0.298552	-0.27332	-0.495899	-0.0663887	-0.219779	-0.124254	-0.375495	-0.133692	-0.144172	0.121216	0.103231	0.0680432	0.325646	-0.0612523	0.0813699	0.28868
TCGA-FU-A3NI-01A	-0.368406	-0.285974	-0.118115	0.36216	-0.0308604	0.139402	-0.321473	0.141674	0.372409	-0.0827276	0.111539	0.0485652	0.0358722	-0.0446075	-0.104296	0.113671	0.215989	-0.451284	-0.41822	0.0473621	-0.0462609	-0.21341	-0.248054	-0.185334	-0.0990681	-0.15599	0.290285	0.318314	0.225009	-0.11031	-0.29481	-0.19123	0.0278443	0.0313361	-0.166728	-0.195434	-0.055038	-0.119892	0.176679	-0.331984	0.0473439	-0.0843396	-0.204536	0.090303	0.197006	-0.29972	0.123555	-0.193295	-0.0696439
TCGA-VS-A9UT-01A	-0.313998	-0.289416	-0.273672	-0.0803887	0.327921	-0.182331	0.276761	-0.400041	-0.466094	-0.264634	0.119667	-0.358352	-0.346258	-0.421495	-0.195818	0.0609558	0.109776	-0.285681	0.0322016	0.0535704	-0.0242874	0.373224	0.123919	-0.0131013	0.0157541	-0.337354	-0.575414	-0.558546	-0.503908	-0.00186246	0.0809214	-0.21453	-0.412889	-0.522094	-0.315712	-0.219834	-0.402458	-0.0654452	0.127458	0.160853	-0.0328448	-0.226958	0.0133124	-0.101427	-0.265367	0.286548	0.0288539	0.137268	0.0927982
TCGA-C5-A8YR-01A	0.11807	0.179877	-0.323212	-0.155817	-0.279209	0.146153	0.129272	0.102861	-0.26705	-0.131441	-0.422186	-0.0211218	-0.171386	-0.206462	-0.138289	-0.126892	0.0779698	-0.346209	-0.0982823	-0.0919869	-0.150342	-0.306659	0.117329	0.00632425	0.0698689	0.00425539	-0.0759082	-0.00631496	0.175714	0.222165	0.0964356	-0.0487882	-0.128287	0.328963	0.142461	0.156873	-0.204162	-0.0265013	-0.145288	0.268498	-0.152515	0.0730007	0.0355828	-0.0847702	-0.0147826	0.170214	-0.015574	0.101527	-0.333713
TCGA-VS-A94X-01A	0.1127	0.187612	0.183399	0.270879	-0.0110639	0.231956	0.217974	-0.0334064	0.246511	-0.0215435	-0.0036149	-0.00942177	0.079468	-0.001692	0.13235	-0.201449	0.329294	0.255142	0.188383	-0.0266067	-0.0815233	-0.0219082	0.182865	0.150976	0.344219	0.261074	0.111137	0.327214	0.327549	-0.135841	0.0174608	0.0809455	-0.0718989	-0.131296	0.12573	0.0419257	-0.0315663	-0.0796278	0.113241	-0.117668	0.082053	0.192295	0.102148	0.0534558	0.124486	-0.0371569	-0.0485558	-0.159573	-0.163914
TCGA-VS-A8EK-01A	-0.172508	-0.0778053	-0.121853	0.154137	0.0596118	-0.117727	-0.0364877	-0.163506	-0.138964	-0.136027	-0.144906	0.0352502	-0.125058	-0.205413	-0.133277	-0.232501	-0.107961	-0.434623	-0.367071	-0.10663	-0.0337419	-0.19229	-0.23861	-0.0316286	0.0177941	-0.203867	-0.235196	-0.262872	-0.0986086	-0.482439	-0.0339958	-0.0320726	-0.243468	-0.137268	-0.178784	0.229717	0.135022	-0.0385177	-0.20317	-0.390671	0.192089	-0.270162	-0.131162	-0.108232	-0.116074	-0.304583	0.0396352	-0.26507	-0.0451185
TCGA-FU-A3HZ-01A	-0.51115	-0.194756	-0.027795	-0.294835	0.230488	-0.177788	-0.443743	0.199472	0.0823769	-0.276522	0.0328964	0.155703	-0.307432	-0.262887	-0.0301518	-0.105739	-0.0768511	-0.695703	-0.554026	-0.284069	-0.421396	0.0427008	-0.236077	0.39514	0.0162787	0.391851	0.0699802	0.558375	0.587982	-0.107017	-0.461096	0.0509468	0.146569	0.462867	0.153546	-0.0852032	-0.297704	0.00950208	-0.28428	-0.0794671	-0.101242	-0.257112	-0.0951326	-0.147559	-0.0110757	-0.33648	0.258919	-0.175743	-0.101512
TCGA-C5-A2LT-01A	0.541498	0.22974	0.0866407	-0.225631	0.231264	0.305693	0.202342	0.0537732	-0.473874	0.251716	0.0371455	-0.186409	0.12209	-0.031191	0.259792	0.192797	0.128557	-0.401166	-0.0905307	0.36989	0.195331	-0.0910195	0.234434	0.237818	-0.00749224	0.0482955	-0.558227	0.042994	0.108806	0.590289	0.417037	-0.13286	-0.297239	-0.0599803	-0.0611345	-0.072993	0.270119	0.0715577	0.333006	0.514795	0.0801932	0.300108	0.336454	-0.187931	-0.276732	0.315493	-0.275612	0.343771	-0.0156852
TCGA-FU-A40J-01A	-0.404087	-0.386898	-0.347898	-0.234742	-0.242565	-0.378094	-0.241706	-0.0860138	-0.398472	-0.193366	-0.190497	-0.27455	-0.130205	-0.193395	-0.363054	0.0113653	-0.280826	0.110175	-0.0837199	-0.216306	-0.161898	-0.335293	-0.190382	-0.374365	-0.332224	-0.519007	-0.31586	-0.432814	-0.287591	-0.192492	-0.174481	-0.151546	-0.21279	-0.44934	-0.241335	-0.419938	-0.250138	-0.325502	-0.0629493	-0.189884	-0.152495	-0.0646068	-0.22558	0.000720198	-0.234413	-0.1013	0.0159111	0.0665824	0.0638019
TCGA-MU-A5YI-01A	-0.103021	-0.0731207	-0.440041	-0.310445	-0.0562414	0.311698	-0.200205	-0.224065	-0.46845	0.122091	0.0611292	-0.00289998	-0.107634	-0.153373	-0.119551	0.318023	-0.0725422	-0.180639	-0.187064	0.278371	0.255324	0.0250132	-0.070075	-0.420042	-0.215828	-0.458858	-0.470911	-0.369085	-0.644859	0.422552	-0.0571271	-0.108602	-0.163609	-0.184818	-0.298935	-0.374542	0.0193402	-0.101645	0.286266	0.313314	0.0360021	0.167344	0.0614337	0.101534	-0.0362063	0.0208915	-0.127549	0.231876	0.157087
TCGA-MA-AA3W-01A	0.423482	0.0604324	-0.0659392	0.268387	0.085441	-0.03741	0.477522	0.0319043	0.225161	0.190193	-0.290999	-0.0553275	-0.0956999	0.0339808	0.140469	-0.102818	-0.15708	0.488545	0.534465	0.0144842	0.237357	0.0172525	0.364689	0.0641348	0.227914	0.0909582	0.196803	0.190347	0.274532	-0.334675	0.436986	0.170166	-0.03748	-0.079671	-0.224932	0.232711	0.16129	-0.0139392	0.0217557	-0.236774	0.135225	0.116102	0.322726	0.170015	-0.0817028	0.564909	0.0015215	0.207952	0.00735781
TCGA-UC-A7PG-06A	-0.328799	-0.217561	0.00526332	-0.0665301	-0.156223	-0.137471	-0.071744	-0.04959	-0.01964	-0.183364	0.0529081	-0.0928906	-0.104523	-0.0965409	-0.127717	-0.0858705	-0.201766	-0.281201	-0.172274	-0.196968	0.00924379	-0.00864879	-0.0596349	-0.170209	-0.173661	-0.210659	0.057692	-0.230556	-0.281131	-0.397512	-0.120985	-0.0706157	-0.0558595	-0.00534855	-0.250592	-0.0855541	0.0539683	-0.201828	-0.295215	-0.279404	-0.052073	-0.0580767	-0.102731	-0.0631582	0.147187	0.141732	-0.0238001	-0.10577	0.0470825
TCGA-EA-A5ZE-01A	-0.166249	-0.187614	-0.0494766	-0.0692012	0.170953	0.18103	0.0186	0.213786	-0.0479648	0.0540895	0.367033	0.134967	-0.0605164	-0.174444	0.216041	0.00984251	0.200863	0.332475	0.319513	-0.0503498	-0.038716	-0.169234	0.125817	0.0936548	0.0414534	-0.139386	-0.0424715	0.243239	-0.0540293	0.145529	0.0171052	0.00361351	0.168404	0.174821	-0.043328	0.237862	-0.0722709	0.0547758	0.206512	-0.254254	0.057141	-0.0745789	-0.0263959	0.00981227	0.167195	0.281093	-0.172476	0.152148	-0.215012
TCGA-4J-AA1J-01A	-0.00545201	-0.107575	-0.0278874	0.21193	0.016595	0.446905	-0.186218	-0.0771935	0.199948	0.0332406	-0.167045	0.0389166	0.202102	0.109756	0.26518	0.130135	0.312595	0.11744	-0.113507	0.276719	0.00175046	-0.117721	-0.186637	-0.187929	0.0608062	-0.134539	-0.0229377	-0.15288	-0.104041	0.277102	-0.0964779	-0.0101233	-0.198641	-0.363886	0.0141725	-0.366609	-0.1603	-0.0717064	0.359913	0.311762	-0.0392736	-0.0991253	-0.161593	-0.0222566	-0.091533	-0.458295	-0.179193	0.0375406	0.0132256
TCGA-C5-A8XH-01A	0.339379	-0.0102214	0.00912415	-0.0199038	-0.090047	0.308616	0.39146	-0.122374	-0.0623201	0.206038	-0.159144	-0.168926	0.0401796	0.13573	0.0529492	-0.0651515	0.00329623	0.635994	0.48118	0.137787	0.0787243	0.217763	0.302712	-0.236612	-0.0174931	0.0325425	-0.210699	-0.111545	-0.178557	0.322383	0.341884	-0.00479893	-0.151236	-0.389484	-0.0181398	-0.131311	0.161333	0.0756955	0.0171493	0.23844	-0.0528376	0.31592	0.155258	-0.0240466	-0.0152998	0.33995	0.0515515	0.204798	0.149311
TCGA-JW-A69B-01A	-0.339248	-0.212054	-0.0481816	-0.370419	-0.23675	-0.213004	0.0171754	-0.0520599	-0.401183	-0.134752	0.209318	0.223045	-0.118618	-0.0177706	-0.163243	0.0455307	0.111298	0.407563	0.130449	-0.126218	-0.0855601	-0.232911	0.0930191	-0.432559	-0.287359	-0.2869	-0.428281	-0.400099	-0.450828	0.0624492	-0.021116	0.327075	0.340682	0.14987	0.0232325	0.105619	-0.220942	-0.0308158	0.00302194	0.40163	-0.0500368	0.311605	-0.0308392	0.367038	0.309397	-0.0634533	0.125127	0.174618	-0.0152471
TCGA-VS-A9V0-01A	-0.496786	-0.11943	-0.260536	0.0414164	-0.0471674	-0.078481	-0.332801	-0.0323774	-0.10377	-0.22204	-0.0340202	0.169376	-0.277042	-0.292654	0.00148642	-0.155256	0.399456	-0.519184	-0.487432	-0.243227	-0.237966	-0.102437	-0.130227	0.0909458	-0.140198	0.0671282	-0.142194	0.0942004	0.0461116	-0.24382	-0.434415	-0.0685855	0.0380785	0.0276305	0.129347	0.0445927	-0.384055	-0.174828	-0.0108367	-0.078793	0.0210941	0.105681	-0.279677	-0.00164173	0.188361	-0.506929	0.0181158	-0.206057	-0.23095
TCGA-EA-A97N-01A	-0.0105762	0.129265	-0.305526	0.422454	0.213891	0.358132	-0.174868	-0.16291	0.347087	0.0113694	-0.0661844	-0.226921	0.142823	-0.0234337	0.232769	0.221937	0.19724	-0.467908	-0.371292	0.294867	0.0108688	0.435874	-0.166952	-0.132971	0.0829749	-0.316239	0.167389	-0.322646	-0.405658	0.389049	-0.168247	-0.0781003	-0.236001	-0.458021	-0.194156	-0.339961	0.075216	-0.258585	0.362371	0.341141	0.0636659	0.121863	-0.0813395	-0.0517336	-0.137364	-0.406864	-0.0505976	-0.0980208	0.0746726
TCGA-Q1-A73S-01A	-0.426967	-0.14396	0.156777	-0.101969	-0.271037	-0.314586	-0.540867	0.378708	0.236767	-0.254441	0.0573221	0.117701	-0.0880338	0.0103864	-0.0606086	-0.117032	-0.177009	-0.626874	-0.621152	-0.134787	-0.310073	-0.0972658	-0.395423	0.0520274	-0.148013	0.237842	0.349583	0.545066	0.581262	-0.247202	-0.512484	-0.069499	0.0925311	0.456887	0.166239	-0.0557015	-0.137849	0.00173222	-0.35788	-0.196126	-0.246536	-0.270431	-0.360909	-0.0936479	0.0803654	-0.558011	0.295615	-0.371068	0.156424
TCGA-ZJ-AAXA-01A	-0.421594	-0.0974043	0.0883375	0.313176	-0.0566259	0.226475	-0.514566	0.220261	0.432259	-0.265093	0.00580398	-0.000292787	-0.0777084	-0.107025	-0.27133	0.0725795	-0.142728	-0.690198	-0.657157	-0.0787096	-0.289443	-0.00763261	-0.402458	-0.0696946	-0.119331	-0.153296	0.453399	0.259914	0.265738	-0.244624	-0.480324	-0.331499	-0.0607216	0.182364	-0.177955	-0.113647	0.0952458	0.0211278	-0.206075	-0.29329	0.0870533	-0.164597	-0.385616	-0.228109	-0.0566522	-0.618229	0.100082	-0.399237	-0.109536
TCGA-DS-A0VL-01A	0.405766	-0.0153031	0.225063	0.0928548	-0.0545954	0.405686	0.273415	0.114351	0.264877	0.194437	0.108943	-0.000870018	0.342577	0.247602	0.369399	-0.00576546	0.121991	0.329499	0.322695	-0.102612	0.0933163	-0.0968172	0.044643	0.285344	0.0441776	0.0938895	0.184335	0.232259	0.364302	-0.266645	0.230089	0.0950218	-0.113956	-0.30859	-0.132529	0.0337617	0.411655	0.242386	0.187017	-0.187796	0.180886	-0.1814	0.123125	0.079768	0.120505	0.142375	-0.0895805	-0.083258	0.0187055
TCGA-EK-A2IR-01A	-0.362853	-0.0108405	-0.0513268	-0.0625245	0.279025	0.0807779	-0.473129	0.179203	0.180666	-0.260265	0.0573172	0.126993	-0.111305	-0.118111	-0.000850529	-0.242213	0.198662	-0.631513	-0.580812	-0.265553	-0.117619	0.311485	-0.427944	0.17841	0.0787668	0.295485	0.303167	0.496554	0.463696	-0.255339	-0.444549	-0.00541633	0.0612264	0.372482	0.0890091	0.214056	-0.00203155	0.0598511	0.0336436	-0.261752	0.0357868	-0.379208	-0.204264	-0.13679	0.0017731	-0.547759	-0.0243555	-0.369076	-0.156481
TCGA-C5-A2M1-01A	-0.0883948	-0.237971	-0.226642	0.00394811	-0.348984	-0.393771	0.0474094	0.194985	0.288331	-0.00736482	-0.0139872	0.230665	0.220781	0.092885	0.262191	-0.354384	0.340037	0.26908	0.232284	-0.309703	-0.144877	-0.363876	0.114122	0.379985	-0.00225497	0.216365	0.304297	0.482679	0.554989	-0.413921	0.0821008	-0.00263516	0.0410156	0.36764	0.0759506	0.443065	-0.281555	0.0721764	-0.0890773	-0.48299	0.000683248	-0.194925	0.0458708	0.024082	0.0321401	0.347112	0.112839	0.00975604	-0.2151
TCGA-C5-A7CJ-01A	0.407863	0.0846762	-0.249633	0.337579	0.206698	0.327728	0.390457	-0.342962	0.030966	0.186452	0.267615	-0.101497	0.0772053	-0.0731792	0.113869	0.0815174	0.0744238	-0.00465901	0.217019	0.208659	0.145741	0.290737	0.183938	-0.213635	0.112281	-0.214392	-0.290528	-0.38572	-0.593697	0.387307	0.399585	-0.207127	-0.235069	-0.376215	-0.290536	-0.304597	0.208398	-0.0539684	0.255195	0.390717	0.070507	0.191818	0.354561	-0.0709689	-0.186349	0.345348	-0.169904	0.378684	0.0303509
TCGA-EA-A1QT-01A	0.0585836	-0.26506	-0.263284	0.018993	0.0255196	-0.237243	-0.248546	0.417587	0.47098	-0.0689692	0.0236578	-0.0523559	-0.319415	-0.200508	-0.280646	-0.350821	-0.250341	0.330788	0.0914384	-0.338268	-0.365148	-0.143284	-0.307756	0.0907063	-0.0742193	0.0638742	0.522009	0.49414	0.657002	-0.397549	-0.186007	-0.0639142	0.0351305	0.300217	-0.0660875	0.115218	-0.0307313	0.138254	-0.242724	-0.437065	-0.221569	-0.327408	-0.279201	-0.115852	-0.152847	-0.257172	0.0873774	-0.317438	-0.158653
TCGA-VS-A957-01A	-0.374363	-0.144395	-0.191346	0.206467	-0.0046662	-0.209066	-0.395393	0.138082	0.342502	-0.126984	-0.14644	0.0816152	-0.118327	-0.148036	0.117793	-0.242784	0.231797	-0.370126	-0.39799	-0.405275	-0.417575	-0.163974	-0.33008	0.0156834	0.220374	-0.0329373	0.395588	0.00055037	-0.10506	-0.587712	-0.448365	-0.155651	0.221564	0.377596	0.0893413	-0.132875	-0.0258239	-0.158446	-0.193392	-0.598393	0.172246	-0.437895	-0.368503	-0.060176	0.20103	-0.520123	0.107561	-0.404322	-0.164889
TCGA-JW-A5VK-01A	-0.337955	0.251759	0.286982	-0.343333	-0.0986409	-0.51128	-0.405496	0.366997	0.0171203	-0.118887	-0.229224	0.105708	-0.128011	0.0879649	-0.215796	0.0607987	-0.371067	-0.504322	-0.49652	-0.116502	-0.113383	0.15098	-0.350006	0.108131	-0.0186719	0.340609	0.349558	0.45315	0.482781	-0.281368	-0.353882	0.191479	0.341059	0.420296	0.35007	0.5802	0.0412534	0.173223	-0.396505	-0.319749	-0.020942	-0.165574	-0.275023	-0.0879932	0.0236684	-0.435661	0.259679	-0.319043	0.183966
TCGA-EK-A2R7-01A	-0.472459	-0.312631	-0.0836818	-0.246654	-0.369847	-0.462958	-0.310407	-0.0447741	0.069586	-0.336161	-0.0664697	-0.0128606	-0.178135	-0.063632	-0.11738	-0.135487	-0.168765	-0.526078	-0.399255	-0.337987	-0.205127	-0.345683	-0.225935	-0.277489	-0.176611	-0.136036	0.201401	-0.0994692	-0.141922	-0.269969	-0.234223	0.0843678	0.206622	0.438545	-0.0986029	0.0186448	-0.383667	-0.208363	-0.0867177	-0.143986	-0.248648	-0.00998631	-0.193401	0.0774629	0.135556	-0.131633	0.253775	-0.0186957	0.130868
TCGA-EA-A4BA-01A	-0.478034	-0.237999	-0.322317	-0.358238	-0.0595308	-0.0923663	-0.574539	-0.089438	-0.342632	-0.377679	0.0807441	-0.102999	-0.351383	-0.248615	-0.247021	0.102976	-0.251683	-0.688293	-0.622523	-0.131961	-0.375178	0.259596	-0.368611	-0.196507	-0.332794	-0.220677	-0.404072	0.216421	0.206616	0.215535	-0.509694	-0.227713	-0.0614918	0.125874	-0.110013	-0.158874	-0.35891	-0.183356	-0.0292997	0.300111	-0.244163	0.0609474	-0.375416	-0.142768	-0.0851556	-0.532352	0.104762	-0.157559	0.0642351
TCGA-EA-A411-01A	-0.202522	-0.246537	-0.0682559	0.0228284	-0.0710691	0.243168	-0.380791	-0.258606	-0.0201031	-0.0862586	-0.0600403	-0.107606	-0.133005	-0.210983	0.0674266	0.301783	-0.115482	-0.653256	-0.507137	0.213926	-0.123851	0.202733	-0.262618	-0.122991	-0.162746	-0.231552	-0.160727	-0.452135	-0.472661	0.491452	-0.182559	-0.0214143	-0.213872	-0.470886	-0.190398	-0.339465	-0.174717	-0.238186	0.290611	0.291138	-0.222363	0.0582803	-0.104181	-0.0563298	-0.0719009	-0.392066	0.228053	0.0556702	0.11757
TCGA-HM-A6W2-06A	-0.608378	-0.21591	-0.343268	0.055593	-0.136744	-0.287505	-0.540865	-0.174861	0.193904	-0.384455	-0.379229	0.113315	-0.239309	-0.378784	-0.268267	-0.305777	0.0338369	-0.663572	-0.658368	-0.299865	-0.339159	-0.094777	-0.388147	0.146697	-0.184074	-0.23744	-0.00346248	0.158461	0.32067	-0.359536	-0.553362	-0.191279	0.154637	0.222244	-0.0142194	-0.349514	-0.527448	-0.269493	-0.229036	-0.248395	-0.0691352	-0.401847	-0.465045	-0.0435161	-0.0117595	-0.591959	0.137591	-0.411211	-0.261211
TCGA-JW-A5VI-01A	-0.103009	-0.269626	-0.344898	0.290305	0.30292	0.160215	0.01177	-0.0289439	0.37872	-9.45e-05	0.347061	-0.277262	-0.0734951	-0.154503	-0.106205	-0.0517168	-0.0105959	-0.207585	-0.177129	0.128787	0.0426153	-0.113036	-0.209938	-0.0951331	0.136841	-0.292109	0.248425	-0.0879809	0.228084	0.176194	-0.0528955	-0.357658	-0.425116	-0.353224	-0.306041	-0.370804	0.0017313	-0.103771	0.062167	-0.0802795	0.0508618	-0.151718	-0.0684175	-0.279043	-0.329217	0.126451	-0.0278742	-0.192248	-0.166593
TCGA-VS-A9UD-01A	-0.153942	-0.158802	0.00946352	-0.362025	-0.209564	-0.423806	0.354296	0.218946	-0.0726389	-0.078131	-0.359042	-0.059742	-0.295953	0.00132366	-0.187423	-0.170582	-0.317435	0.673735	0.593908	-0.131662	0.0364377	-0.373924	0.31518	-0.121355	0.179648	0.114046	0.148423	0.194217	0.271563	-0.423228	0.285656	0.193454	0.191276	0.304572	0.0271419	0.305576	0.00516911	0.166783	-0.469406	-0.420807	-0.0537986	0.0293117	0.252699	-0.0989971	0.109275	0.515607	0.187164	0.0255617	0.0836566
TCGA-DS-A0VN-01A	0.404427	0.203916	-0.197864	-0.121419	-0.0752546	0.0114877	0.513991	-0.250089	0.208369	0.256053	0.0109443	-0.163589	0.00476167	0.217532	-0.0576627	0.146758	-0.203036	0.495162	0.552965	0.300273	0.210983	0.142249	0.449442	-0.141635	0.132263	0.166052	0.208473	0.255729	0.154273	0.532952	0.487434	0.118221	-0.0768291	0.0949746	0.160579	0.195632	0.133814	0.141873	-0.0080424	0.492076	-0.0930696	0.432773	0.324693	-0.145327	-0.239051	0.588264	0.0224953	0.325867	0.236474
TCGA-HM-A3JK-01A	0.117467	0.144383	-0.310143	-0.247094	0.31013	0.150032	0.0229683	-0.0306778	-0.441169	0.0484542	0.166841	-0.0212485	-0.099648	-0.105235	-0.31235	0.443513	-0.366588	-0.444569	-0.372205	0.380552	0.277723	0.306255	-0.0523277	-0.24097	-0.203987	-0.485436	-0.449414	-0.378109	-0.382844	0.559863	-0.000732512	0.190099	-0.153063	-0.349753	-0.0898153	0.0548993	0.199564	-0.174037	0.309303	0.430988	-0.166526	0.446541	0.0652839	0.216925	0.00444335	0.0190582	-0.228935	0.245866	0.0345973
TCGA-LP-A5U3-01A	-0.0457031	-0.122433	0.191959	0.180053	-0.104704	0.117857	0.181823	0.117722	0.41337	0.148373	-0.143509	0.226636	0.109839	0.180358	0.253191	-0.324148	0.442618	0.643762	0.48441	-0.0731216	0.0558425	-0.250476	0.104583	0.191171	0.26739	0.371157	0.472121	0.417023	0.23165	-0.527651	0.116219	0.148603	0.302134	0.312281	0.0259468	0.0410797	0.315215	0.118116	-0.0594009	-0.313954	0.19104	-0.210409	-0.0649288	0.0807285	0.216027	0.2128	0.0262554	-0.0780458	-0.133509
TCGA-DG-A2KH-01A	-0.263439	-0.143395	-0.071776	-0.0865419	-0.434702	-0.421792	-0.355657	0.237676	0.148895	-0.284787	-0.325228	0.228317	0.00387442	-0.0229982	0.15539	-0.331419	0.200606	-0.50147	-0.413233	-0.399873	-0.256781	-0.369213	-0.319746	0.378106	-0.123641	0.139417	0.360604	0.466155	0.499888	-0.533082	-0.37324	-0.0709578	0.288038	0.385333	0.245219	0.156426	-0.279364	-0.0377694	-0.111346	-0.580582	-0.170868	-0.385206	-0.318874	0.154142	0.280105	-0.371194	0.122474	-0.26154	-0.203805
TCGA-C5-A2LS-01A	-0.299136	-0.324864	-0.0902795	-0.0785333	-0.388404	-0.383128	-0.313934	-0.193525	-0.0925803	-0.298567	-0.110544	-0.325648	0.0298085	0.000677353	-0.0762041	-0.253905	-0.0529531	-0.53507	-0.479343	-0.350934	-0.244001	-0.0441064	-0.235546	-0.462266	-0.351021	-0.442355	0.00925769	-0.559444	-0.612762	-0.445311	-0.36864	-0.156705	-0.0563593	-0.371698	-0.0648052	-0.249572	-0.35578	-0.322705	-0.0660098	-0.354179	-0.140771	-0.23692	-0.279182	0.205112	0.0124376	-0.475741	0.237935	-0.22111	0.116379
TCGA-IR-A3LH-01A	0.3424	0.167337	0.0449103	-0.17806	-0.0132329	0.325891	0.493592	0.0286769	-0.328165	0.291094	0.0936714	-0.224041	-0.203507	-0.256333	0.0622578	0.236088	0.16588	0.587625	0.549247	0.301561	0.154889	0.0186644	0.452025	-0.0953683	0.25553	0.0229383	-0.339705	-0.303117	-0.544314	0.557911	0.472554	0.00761318	-0.310283	-0.357179	-0.0448201	0.0852196	-0.0756901	0.156775	0.222669	0.329601	0.154127	0.408484	0.353774	0.0878779	-0.00671956	0.571326	-0.0937563	0.381009	0.0173398
TCGA-MA-AA3X-01A	0.153298	0.0395882	0.15966	-0.233886	-0.17444	0.0754485	0.0395586	-0.400982	-0.353583	0.0708688	0.232976	-0.140051	0.134288	0.0246898	0.0805468	0.17147	0.00537289	-0.267381	-0.143719	0.0600503	0.00306406	0.130137	0.284486	-0.327198	-0.243108	-0.252758	-0.475105	-0.479883	-0.581902	0.151849	0.295178	0.0688862	-0.129732	-0.35705	-0.0955227	0.0410516	0.10968	0.0857302	0.0275449	0.286312	0.310505	0.301573	0.0324211	-0.039006	-0.0555652	-0.0300096	0.216221	0.345322	0.184869
TCGA-VS-A954-01A	-0.339936	-0.0500983	0.181101	-0.0509969	-0.0347349	-0.195219	-0.376683	0.0508127	0.366106	-0.329148	0.135583	0.0670916	-0.129472	-0.0513357	-0.242628	0.0466946	-0.280199	-0.518036	-0.469157	-0.271583	-0.243574	0.0996936	-0.264066	0.00593322	-0.205911	-0.134875	0.37725	0.386479	0.503433	-0.134153	-0.410334	-0.137624	-0.0730085	0.262676	-0.184435	-0.144614	0.121511	-0.0165795	-0.175367	-0.0176944	-0.086146	0.0789528	-0.301691	0.0129782	-0.00701407	-0.222496	0.20429	-0.323914	0.118322
TCGA-EA-A3HS-01A	-0.0153119	-0.0802746	-0.224919	0.239256	0.171044	0.0729901	-0.0366314	-0.260302	0.0754998	-0.131926	0.0896878	-0.238678	-0.0419266	-0.220222	-0.0858556	-0.108408	0.0379626	0.26675	0.107214	-0.0747388	-0.194746	-0.091253	-0.150572	-0.0408405	0.0867473	-0.333453	-0.0372701	-0.355078	0.258819	-0.273609	-0.134757	-0.368811	-0.282167	-0.445206	-0.277716	-0.333929	0.112996	-0.128202	0.0894127	-0.123355	0.150098	-0.287824	-0.134189	-0.222461	-0.276164	-0.224839	-0.00909955	-0.229373	-0.122442
TCGA-EA-A3HR-01A	-0.243662	0.0167934	0.0810393	0.192457	0.265069	0.136155	-0.255739	-0.276099	-0.0337495	-0.129261	0.0473754	-0.0860369	0.205268	0.139882	0.213547	0.0798988	0.249031	-0.515287	-0.421806	0.206607	0.258448	0.178464	-0.195069	-0.164571	0.19957	0.00853751	-0.235083	-0.333708	-0.493128	-0.109195	-0.181461	0.0686289	0.112656	-0.356964	-0.23495	-0.353186	0.106879	-0.208788	0.279573	-0.146279	0.115953	-0.115984	-0.171528	0.144721	0.0448257	-0.386247	-0.0269729	0.0450881	0.13226
TCGA-JX-A3Q0-01A	0.336222	0.117185	0.324268	0.202494	0.0510597	0.198046	0.204634	0.0426199	0.199968	0.29024	-0.161588	0.140336	0.101719	0.123973	-0.0365001	-0.165543	0.260494	0.679984	0.565286	-0.0113495	0.165504	-0.237647	0.224325	0.124259	0.247872	0.338105	0.219445	-0.115125	-0.0573719	-0.392323	0.270025	0.228999	0.214506	0.0961537	0.184901	0.51088	0.40751	0.127476	-0.186139	-0.216573	0.233852	0.0409988	0.0191028	0.167246	0.222004	0.341187	-0.174584	0.0694866	0.0435605
TCGA-DS-A3LQ-01A	-0.242629	-0.100909	0.174203	-0.150776	0.0277057	-0.0839299	-0.133508	-0.0293063	-0.160043	0.017711	0.141868	0.0544889	0.0673136	0.0247898	-0.251792	0.182517	0.238085	-0.281245	-0.284938	0.0915194	0.0603092	0.342266	0.0461994	0.0844659	0.0426467	0.246548	-0.0788478	0.253183	0.216881	0.335927	-0.0175884	0.228718	0.199719	0.138288	0.0388896	0.345103	0.0411233	0.129188	0.0975884	0.283573	0.227103	0.235002	0.092814	0.09146	0.0296446	-0.262752	0.166346	0.0740607	0.134263
TCGA-EK-A2R8-01A	0.284382	0.212393	0.113178	0.258184	-0.0872206	0.495624	0.126659	0.308599	0.485716	0.170138	0.0960184	-0.0618196	0.128992	0.1861	0.348813	-0.0602393	0.425633	-4.74e-05	-0.050228	0.187712	-0.0196837	0.165295	0.161981	0.281553	0.288339	0.375994	0.513277	0.598429	0.480588	0.460962	0.0519717	-0.100991	-0.140572	-0.0309546	0.334884	0.04296	-0.121345	0.186307	0.256562	0.578192	0.0395104	0.297018	0.0461914	-0.178437	-0.0557398	-0.0890045	-0.0714553	0.102047	-0.328026
TCGA-FU-A3TX-01A	0.0228861	0.111717	0.00627919	0.232101	0.158354	0.181844	0.163893	0.270631	0.299353	-0.185372	-0.0922342	0.0854909	-0.152014	-0.109891	0.0771019	-0.191999	0.148875	-0.399391	-0.260741	0.0358406	-0.0494229	0.189733	-0.168354	0.156322	0.259682	0.199889	0.412125	0.478009	0.308154	-0.15794	-0.106367	-0.115557	-0.0115206	0.0274886	-0.00286107	-0.109058	-0.0337898	0.062925	0.0918839	-0.00106475	0.0886525	-0.296445	-0.105928	0.0155798	-0.0171722	0.070782	-0.0401403	-0.1567	-0.20987
TCGA-EA-A556-01A	-0.50248	-0.278143	-0.391702	-0.353041	0.0771116	0.166329	-0.469328	-0.101653	-0.351836	-0.369366	-0.146052	-0.210082	-0.39005	-0.395688	-0.272602	0.0785301	-0.0676049	-0.29415	-0.407297	-0.199398	-0.238987	0.227526	-0.327177	0.0564591	-0.341135	-0.220298	-0.446582	-0.0813047	0.210054	0.185869	-0.422873	-0.252812	-0.248862	0.0301733	-0.146242	-0.407208	-0.516175	-0.0835887	-0.0528778	0.142728	-0.206943	-0.152728	-0.295371	-0.0392863	-0.147638	-0.489429	0.048065	-0.208083	0.0395538
TCGA-VS-A9UO-01A	-0.393051	-0.295216	-0.0350141	-0.148414	-0.206398	-0.360732	-0.278418	-0.145025	-0.332985	-0.35709	0.0222598	-0.203225	-0.00900271	-0.0396991	-0.0545357	-0.187599	0.04198	0.163643	-0.0789522	-0.258811	-0.168501	-0.23914	-0.180551	0.115497	-0.174151	-0.267057	-0.319633	-0.555871	-0.38248	-0.54457	-0.418288	-0.133841	-0.0983257	-0.265458	-0.060978	-0.250048	-0.35189	-0.138578	-0.212317	-0.440924	-0.0508937	-0.196801	-0.33234	0.0692815	-0.0831469	-0.410626	-0.0690597	-0.320669	0.0326655
TCGA-EX-A3L1-01A	0.566988	0.475985	-0.0285826	0.292634	0.281057	0.312513	0.415755	-0.182896	-0.251422	0.304915	0.226236	-0.0476632	0.322818	0.159136	0.341736	0.391991	0.255254	-0.253607	0.0818513	0.462226	0.422743	0.438934	0.35296	0.00827669	0.00604341	0.071304	-0.38331	-0.27745	-0.225668	0.586348	0.486897	0.0858865	-0.221826	-0.425808	0.376121	-0.0136173	0.236949	0.120069	0.431457	0.575394	0.187141	0.397717	0.343618	-0.0775103	-0.109498	0.136422	-0.129115	0.3921	0.0767445
TCGA-2W-A8YY-01A	-0.545527	-0.177101	0.18993	-0.067954	0.150811	-0.0217125	-0.363951	0.24125	-0.147061	-0.174198	-0.0624304	0.24318	-0.292695	-0.369976	0.00880545	-0.124272	0.165404	-0.714947	-0.606163	-0.13802	-0.355943	0.0481577	-0.351457	0.308678	0.0637897	0.281635	-0.266847	0.277522	0.342337	-0.252959	-0.396172	-0.0976033	0.134258	0.314958	0.0444959	0.0485629	-0.353856	-0.119351	-0.147951	0.0528224	-0.0154194	-0.368797	-0.283739	-0.0860326	0.171668	-0.389351	-0.0448332	-0.196948	-0.319033
TCGA-VS-A9UR-01A	-0.197186	0.102957	0.165652	0.268167	0.132027	-0.0137875	-0.194762	-0.178191	-0.0976328	-0.18867	0.18441	-0.173471	0.0839273	-0.0158957	0.0363143	0.00890548	0.107692	-0.163923	-0.265371	-0.0154605	-0.127035	0.219144	-0.304182	-0.11721	-0.247305	-0.104274	-0.249666	-0.365477	-0.47355	-0.194569	-0.311697	-0.26394	-0.220979	-0.413721	0.113649	-0.200731	-0.26007	-0.166099	0.0966419	-0.17881	0.00974457	-0.345169	-0.315443	0.0833806	-0.0799521	-0.401251	-0.0952584	-0.32394	0.118795
TCGA-HM-A4S6-01A	-0.172186	0.0498312	0.0625478	0.364018	0.22379	0.27932	0.21515	-0.251962	0.324873	-0.100392	0.0826904	-0.0113547	-0.0804187	-0.0721439	-0.0487685	0.11273	0.224685	0.251116	0.212319	0.302381	0.0895029	0.271467	0.0938577	-0.0521254	0.241176	0.0996139	0.285364	-0.268949	-0.0393791	0.071773	0.1102	-0.104656	-0.0857452	-0.444417	0.035514	-0.309981	0.0674201	-0.0566109	0.0632461	0.213506	0.0183404	-0.0318997	0.0593444	0.0411143	-0.00300472	0.224893	-0.0772365	0.0349757	-0.0934373
TCGA-FU-A770-01A	0.338126	0.022183	0.1396	0.243779	-0.225882	0.103172	-0.0742651	-0.182982	-0.0908496	0.0806128	-0.124021	0.0221322	0.196327	0.137627	0.0685415	-0.0171609	-0.10738	-0.192083	-0.21965	0.0153411	0.00720186	0.0913292	-0.0204801	-0.244504	-0.220875	-0.164581	-0.00859694	-0.424603	-0.381023	-0.0696376	0.101842	-0.00716526	0.042678	-0.000674959	0.0318869	-0.245984	-0.0200214	-0.0453162	0.296065	0.198304	-0.0334179	0.0218128	0.0154763	0.0700029	-0.144765	-0.144986	0.228457	0.194417	0.0960423
TCGA-VS-A9UC-01A	-0.24183	-0.210631	0.084017	-0.0778879	-0.0564297	-0.275089	0.0222746	-0.450281	-0.360745	0.021942	0.149064	-0.160964	0.180405	0.0821624	-0.151804	0.186282	-0.262165	0.318242	0.301346	-0.0521834	0.122689	0.0268078	0.139764	-0.245103	-0.180942	-0.315916	-0.440145	-0.636465	-0.654924	-0.0200413	0.0382683	-0.094441	-0.258374	-0.595659	-0.278521	-0.468417	-0.00328669	-0.245611	-0.121029	0.0331486	-0.0583831	0.118545	0.0475073	0.229553	-0.0988718	0.170483	-0.147513	0.101241	0.246906
TCGA-DS-A1OC-01A	0.42284	0.165688	0.193249	0.0516201	0.122395	0.319369	0.177892	-0.0282515	0.0899982	-0.0124317	0.192881	0.1632	0.0347422	-0.150364	0.339748	-0.323557	0.328188	-0.428108	-0.15876	-0.177882	-0.0870991	-0.00590716	0.0902202	0.292915	0.203042	0.346258	-0.00990149	0.256809	0.44363	-0.259789	0.204349	-0.000118124	-0.0834435	-0.171421	0.0792972	0.0806899	0.134182	0.161847	0.043478	-0.205621	0.125361	-0.224338	0.112299	0.00900239	0.115269	0.124282	-0.0428246	-0.0779925	-0.199121
TCGA-EX-A69M-01A	0.286555	-0.142479	-0.108794	-0.264978	-0.10365	-0.159318	0.363974	-0.238329	-0.293774	-0.00904938	-0.00972053	-0.0317016	0.0575174	-0.0618396	0.248247	-0.266729	0.384781	0.453243	0.457583	-0.253421	0.301688	-0.0896906	0.274574	0.140383	0.117734	-0.148375	-0.343292	-0.160091	-0.233239	-0.412346	0.364997	0.0286798	-0.0871421	-0.206919	-0.0115093	-0.0877813	-0.0762265	-0.00732906	-0.206837	-0.180148	0.0512315	-0.121352	0.0122483	-0.0265592	0.103577	0.419217	-0.16065	0.191013	-0.100445
TCGA-JW-A5VJ-01A	-0.352681	-0.0472635	0.16548	-0.0361659	-0.12635	-0.356741	-0.316008	-0.226113	-0.0565986	-0.267706	0.145041	-0.0662784	-0.0252816	-0.068806	-0.331878	0.0539401	-0.342826	-0.54385	-0.467872	-0.0517847	-0.222296	-0.0471147	-0.337708	-0.195582	-0.135893	-0.0836845	-0.099952	-0.178543	-0.0418143	-0.38599	-0.406357	-0.191047	-0.219313	-0.124682	0.0286809	-0.288891	-0.0643758	-0.0683765	-0.358304	-0.172129	-0.130431	-0.0548587	-0.303331	-0.0790355	0.0709696	-0.380183	0.00656427	-0.228314	0.249031
TCGA-EX-A1H6-01B	-0.363596	-0.289471	-0.245793	-0.485602	-0.312156	-0.382562	-0.317687	-0.415174	-0.593895	-0.133793	-0.143862	-0.0605069	0.184424	0.183305	-0.431668	0.258413	-0.477948	0.0137698	-0.255785	-0.0437085	0.0489009	-0.115926	-0.194411	-0.525235	-0.473423	-0.542929	-0.569139	-0.599764	-0.500126	0.217153	-0.237588	0.102598	-0.126037	-0.140264	-0.254371	-0.329938	-0.203774	-0.228803	0.0502412	-0.0474734	-0.25434	0.157174	-0.139722	0.158901	-0.00811955	-0.271724	0.0858948	0.164863	0.343811
TCGA-EA-A3Y4-01A	0.509494	0.245098	-0.138975	-0.425714	-0.177965	0.195714	0.401356	-0.172589	-0.542744	0.296418	-0.159697	-0.192496	0.129598	0.220681	-0.0397597	0.196826	-0.436706	0.455163	0.497697	0.244079	0.183851	-0.0141203	0.397716	-0.280729	-0.102033	-0.25577	-0.559562	-0.218503	-0.285147	0.482484	0.393657	0.036077	-0.233106	-0.220232	-0.0520621	0.10874	0.175284	0.0283195	0.077896	0.459215	-0.237481	0.390843	0.351711	-0.0450038	-0.0677094	0.549481	-0.0950965	0.41911	0.227869
TCGA-JW-A5VL-01A	0.196271	0.0115247	-0.106206	0.14008	0.0879838	0.300725	0.252734	0.239861	0.345238	0.169779	0.0825114	0.11788	-0.0952565	0.0337373	-0.0360374	-0.0859829	-0.0461172	0.515256	0.425115	0.254521	0.0652594	-0.0785532	0.16778	0.172345	0.31578	0.217079	0.42481	0.313007	0.316601	-0.341937	0.228734	-0.0128723	-0.0599505	0.168083	-0.016791	0.0171053	0.229771	0.146469	-0.296273	-0.107145	0.100596	-0.0858408	0.0451484	-0.121909	0.0976527	0.387315	-0.0725081	-0.161148	-0.144156
TCGA-EA-A1QS-01A	0.0381516	0.192035	-0.179718	-0.00699144	0.362323	0.518591	0.140539	-0.356308	-0.513429	0.10986	0.0410807	-0.157716	-0.0408431	-0.174335	0.102796	0.405845	0.363342	-0.544258	-0.418158	0.428652	0.186663	0.492444	-0.0117473	-0.159084	0.059201	-0.350284	-0.606169	-0.565885	-0.637038	0.669363	0.139521	-0.108613	-0.252843	-0.52902	-0.0996678	-0.319512	0.00964813	-0.205287	0.526954	0.494914	-0.00329593	0.333826	0.168104	-0.0384651	-0.257124	-0.216849	-0.25796	0.289963	-0.0609508
TCGA-JX-A3PZ-01A	0.412883	0.427085	0.181386	-0.291677	-0.00630604	0.166195	0.271747	0.274683	-0.297667	0.266443	0.0698579	0.173198	0.132347	0.0831171	0.193313	0.278579	-0.104725	0.124288	0.295429	0.308498	0.0076421	0.111864	0.341569	0.256241	0.0208517	0.384507	-0.0760181	0.538888	0.589721	0.570307	0.410232	0.27579	0.0663349	0.312355	0.34498	0.144386	0.198036	0.167446	0.120266	0.412701	-0.159304	0.303209	0.158604	-0.19609	-0.06299	0.434654	-0.141261	0.234989	-0.0136363
TCGA-DG-A2KK-01A	0.0457476	0.269215	-0.0418631	0.0685958	-0.123779	-0.267844	-0.0205549	0.0774951	0.0351713	-0.0547623	-0.0760601	0.0486096	0.0279384	0.00501591	-0.19045	0.152996	-0.276908	-0.326957	-0.242282	-0.00874797	0.0741797	-0.244584	-0.112269	-0.156512	-0.165645	-0.00757222	0.189176	-0.0686445	-0.135549	-0.189347	-0.048539	0.111342	0.211337	0.135367	0.158063	0.0664696	0.0213089	0.0852239	-0.12271	-0.180477	0.0693073	-0.0321785	-0.196176	0.146739	-0.00153951	-0.216982	0.112335	-0.112172	0.166777
TCGA-VS-A9UH-01A	0.364784	0.0474753	-0.0034241	-0.28868	0.161218	-0.0768354	0.488172	0.0149817	-0.227053	0.250435	-0.0271453	-0.185954	-0.194331	-0.0329646	-0.128716	0.220435	-0.095564	0.712198	0.64441	0.3888	0.174522	0.0172356	0.442305	0.137658	-0.0330538	0.172209	-0.115442	0.156761	0.313785	0.542576	0.525066	0.0815313	-0.155727	-0.0726754	0.0667968	0.172974	0.147322	0.179734	-0.144812	0.577083	-0.0673266	0.433405	0.353517	-0.0421408	-0.236002	0.589393	-0.141255	0.295179	0.0303241
TCGA-EA-A439-01A	-0.400088	-0.173972	-0.0152914	0.35249	-0.0455209	0.207142	-0.332282	0.0569088	0.484112	-0.0669376	0.191722	-0.197714	-0.177332	-0.118497	0.320631	0.155834	0.365051	0.234151	0.154845	-0.0217993	-0.228728	-0.0172571	-0.081899	0.119071	0.0673056	0.138466	0.516314	0.165514	-0.335716	0.46298	-0.328281	-0.129162	0.0152161	-0.379412	-0.0387055	-0.144482	-0.356607	-0.0973717	0.350164	0.092915	-0.0369032	-0.176479	-0.174096	0.106172	0.0839816	-0.268581	0.262581	-0.0936212	-0.179147
TCGA-EA-A3HQ-01A	-0.125309	-0.0853221	0.304235	0.387847	0.135668	0.143628	0.130207	0.0824611	0.542497	0.0346015	0.0980221	0.0517427	0.00309426	-0.0135148	0.101401	-0.199118	0.050861	-0.191726	-0.105293	-0.0823871	0.0125122	0.05298	0.0867896	0.192543	0.231791	0.30876	0.519881	0.408737	0.487736	-0.0219707	0.143503	-0.140419	-0.0296644	-0.180977	-0.0503735	0.0361033	0.163453	0.172796	0.190988	-0.107693	0.135358	-0.0554626	0.0668475	-0.00120497	0.114823	0.213936	0.0399385	0.0447289	-0.197677
TCGA-EA-A6QX-01A	-0.312273	-0.121104	-0.184229	-0.068971	-0.0317277	-0.158657	-0.0847137	0.22876	-0.164717	0.0913074	0.0554175	0.182378	-0.115968	-0.0369839	-0.26183	0.0831421	0.0252153	0.688867	0.489336	-0.143042	-0.237672	-0.459396	0.0906561	-0.145449	-0.0133223	-0.0771426	0.0010355	-0.286934	-0.178596	-0.297756	-0.0928979	0.034149	0.221623	0.323227	0.0487577	0.201824	0.116617	-0.0744734	-0.155281	-0.239747	0.0449746	-0.0314501	-0.0430798	0.195605	0.170902	-0.0736826	-0.0775244	-0.098101	-0.0100381
TCGA-C5-A7UI-01A	0.142524	0.102096	0.201685	-0.532165	-0.221711	-0.566922	0.279818	0.0393764	-0.42766	-0.12409	-0.21315	-0.0391725	-0.305514	-0.0925191	-0.404628	0.124864	-0.534337	0.532386	0.466487	-0.0809031	0.0414918	-0.152598	0.121261	0.0357937	-0.152598	0.0334063	-0.268648	-0.0497496	0.362736	-0.00149811	0.241751	0.13821	0.186244	0.339577	0.0508226	0.192991	-0.0188859	0.0194679	-0.4442	0.191141	-0.259363	0.21786	0.101806	0.0138116	-0.103017	0.408376	-0.0133678	0.0939673	0.241337
TCGA-VS-A950-01A	0.102108	0.335289	0.122779	0.228703	0.128317	0.348076	-0.155945	-0.0458057	0.285845	-0.0463746	0.0182551	-0.12961	0.171225	0.100839	0.0921821	0.240603	-0.0217528	-0.532376	-0.400075	0.114059	-0.0346265	0.358633	-0.138664	0.265948	-0.11429	0.222671	0.29845	0.201602	0.331894	0.393796	-0.0491816	-0.0738866	0.0407715	0.148662	0.251423	-0.175356	0.057358	0.134696	-0.00693056	0.375379	0.0483237	-0.0115245	-0.0607433	-0.186014	-0.0906128	-0.275997	0.0418854	-0.104182	-0.0393568
TCGA-DS-A5RQ-01A	0.531215	0.330311	0.42957	-0.105916	0.00806803	0.404342	0.355979	-0.320379	-0.364012	0.393678	0.233809	0.15192	0.388189	0.40441	0.317263	0.227048	-0.0853686	0.374956	0.405681	0.235018	0.474034	0.281505	0.3372	-0.428309	-0.0302455	0.128437	-0.345907	-0.404641	-0.548897	0.268822	0.366529	0.270921	0.341482	0.0711026	0.191664	0.218265	0.378765	0.170164	0.122845	0.30513	0.219629	0.341464	0.28054	0.303413	0.191876	0.240149	-0.022625	0.333715	0.323173
TCGA-VS-A9UP-01A	-0.628113	-0.372448	-0.0656773	0.198424	-0.00123619	-0.20014	-0.621323	0.00441622	0.333642	-0.46391	0.179089	-0.111577	-0.352485	-0.347653	-0.22339	-0.0589092	0.0668217	-0.643481	-0.638335	-0.251846	-0.28751	0.196669	-0.506144	-0.164159	-0.256309	-0.241658	0.268533	-0.119738	-0.333413	-0.308762	-0.565304	-0.226588	-0.087267	-0.094927	-0.0704263	-0.450156	-0.407758	-0.333966	-0.021597	-0.193078	-0.127512	-0.444383	-0.422557	-0.0071939	0.0115399	-0.652128	0.250347	-0.407687	0.0910378
TCGA-C5-A7CG-01A	-0.173605	-0.346049	-0.443515	-0.112288	-0.0870736	-0.394523	0.364526	-0.0628042	-0.0515308	0.0114376	-0.334054	-0.0608155	-0.333967	-0.279438	-0.285179	-0.295354	0.121968	0.606126	0.554809	-0.191045	0.0229048	-0.0806123	0.237653	-0.181128	0.0419454	-0.320638	-0.0447075	0.096913	-0.125311	-0.415819	0.20215	-0.159483	0.0384588	0.28823	-0.43926	-0.115764	-0.192373	-0.232013	-0.228617	-0.28843	-0.00638033	-0.232168	0.132231	-0.0433606	-0.0993686	0.525875	-0.0967697	-0.0220708	-0.121347
TCGA-MY-A5BD-01A	-0.281213	-0.0109447	-0.0738076	0.0183064	0.269487	-0.0305516	-0.4386	0.164148	0.239594	-0.1638	0.11314	0.00505635	0.0164892	0.102686	-0.10216	-0.0372106	-0.147916	-0.539592	-0.481613	-0.203534	-0.0314366	0.0302079	-0.257182	0.0248772	-0.0137323	-0.0879287	0.419593	0.355225	0.0559107	-0.332641	-0.415153	-0.0413408	0.102499	0.222473	-0.0259275	-0.0402045	-0.076818	0.141589	-0.288848	-0.321497	-0.0486952	-0.323127	-0.246748	-0.0150262	0.101378	-0.374382	0.203276	-0.266549	0.121815
TCGA-EK-A2RE-01A	0.406374	0.352203	0.26659	0.246484	-0.0496833	0.362838	-0.0747984	-0.352132	0.00215793	0.133464	0.167011	-0.186617	0.291742	0.300916	0.194457	0.175094	0.198057	-0.421852	-0.326958	0.257007	0.131791	0.268714	-0.0285007	-0.0508433	0.0625081	0.108507	-0.178776	-0.0251666	-0.270045	0.433544	-0.0296129	-0.0467483	-0.0972725	-0.295971	0.111078	-0.130043	0.251136	0.0762141	0.260351	0.302243	0.162763	0.0557199	0.0232724	-0.168638	-0.307104	-0.427083	0.0351559	0.0258132	0.284065
TCGA-UC-A7PG-01A	0.308201	0.27887	0.261238	-0.04001	0.0931903	0.256832	-0.102039	-0.492528	-0.375408	-0.007136	0.154344	-0.143356	0.34412	0.105736	-0.00344655	0.291081	-0.0537017	-0.517276	-0.406467	0.158118	0.224544	0.344342	-0.219511	-0.229246	-0.132626	-0.156269	-0.554434	-0.443961	-0.403525	0.225245	-0.0266149	-0.039583	-0.0852356	-0.405963	-0.115632	-0.306862	0.230977	-0.165262	0.237029	0.162952	0.0917399	0.0806063	0.0170073	0.124934	-0.028377	-0.304868	-0.0888918	0.0631357	0.300824
TCGA-VS-AA62-01A	0.528032	0.332274	0.324738	0.206917	0.289452	0.343673	0.564071	-0.324481	-0.0771748	0.286204	0.0530833	-0.145001	0.17729	-0.0245491	0.38162	0.0499354	0.155232	0.571005	0.594913	0.301726	0.23604	0.228242	0.466929	0.00857672	0.265533	0.252033	-0.285899	-0.182868	-0.351261	0.414352	0.588038	0.169605	-0.252029	-0.545575	0.0545504	-0.237135	0.0805473	-0.0375925	0.363331	0.429938	0.174064	0.281818	0.418258	0.0439531	-0.00181741	0.623351	-0.0982705	0.434767	-0.1121
TCGA-MA-AA3Y-01A	0.557583	0.118628	0.207925	0.235878	0.143755	0.403307	0.577392	0.00856374	0.356595	0.292636	0.114132	-0.124202	0.0101064	0.0282116	0.325546	-0.124557	0.340915	0.566046	0.583927	0.326682	0.0876637	0.229329	0.458284	0.420849	0.250659	0.443927	0.249398	0.542254	0.627418	0.447547	0.566485	0.122905	-0.113082	-0.0670934	0.00180966	-0.0354425	0.0992225	0.166705	0.260353	0.386925	-0.0167026	0.403556	0.381555	-0.0538219	0.0516557	0.596867	-0.159629	0.429182	-0.157467
TCGA-UC-A7PI-01A	-0.393089	-0.35749	-0.079288	0.119501	-0.285371	-0.164748	-0.431759	0.268833	-0.0664637	-0.180583	-0.04444	-0.0774089	-0.0359069	-0.0959164	0.050212	-0.294787	0.336167	0.148774	-0.266672	-0.264235	-0.16339	-0.270492	-0.318554	-0.0343534	-0.0982991	-0.220677	0.0673794	-0.289308	-0.35	-0.482775	-0.428947	0.0070379	-0.00174613	-0.16786	0.134159	-0.252115	-0.230248	-0.210697	-0.0476112	-0.451271	-0.0545912	-0.36779	-0.287415	0.138177	0.0940326	-0.516272	0.0721419	-0.276408	-0.191964
TCGA-DG-A2KJ-01A	-0.344822	-0.0982751	0.0112721	-0.533007	-0.415349	-0.406403	-0.177656	0.114004	-0.50275	-0.221282	-0.111065	0.118548	-0.0507478	0.0843014	-0.37638	0.214111	-0.458032	-0.143732	-0.130212	-0.0379942	0.0867961	-0.285211	0.070351	-0.315661	-0.267514	-0.265897	-0.420078	-0.230747	-0.0530125	-0.0354738	0.0260116	0.18879	0.0542556	0.240542	0.0521975	0.218352	-0.180889	-0.0325538	-0.397836	0.122795	-0.209141	0.326888	0.0368031	0.0979155	-0.0270865	0.257275	0.0296644	0.130376	0.307141
TCGA-VS-A9V3-01A	-0.0937491	-0.0659221	0.174174	0.39764	0.16731	0.311329	0.0141704	-0.125813	0.151043	0.110935	0.0408168	0.035851	0.151834	0.010054	-0.00415785	-0.0781846	0.0777616	0.587237	0.431368	-0.0730602	0.0711313	0.100429	0.0591766	-0.0242341	0.180857	0.0481958	0.0478938	-0.320621	-0.315985	-0.362877	0.0104251	0.0103856	0.0518676	-0.34128	-0.0583023	-0.304644	0.256431	-0.0525011	-0.0805397	-0.259063	0.172647	-0.233569	0.00921823	0.25019	0.176736	0.109296	-0.167988	-0.159398	-0.0358347
TCGA-DS-A7WF-01A	-0.307036	-0.127741	0.0863498	0.393966	-0.0307046	0.49529	-0.236222	0.214314	0.286303	-0.0205164	-0.0732407	-0.169185	-0.0171669	-0.140327	0.15734	0.113537	0.292995	0.220128	-0.0488329	0.120386	-0.222608	0.232824	-0.282731	0.106969	-0.111247	-0.0194442	0.328657	-0.0522927	-0.3653	0.204179	-0.275654	-0.275369	-0.165001	-0.357572	-0.0300085	-0.221881	-0.334429	-0.130796	0.220708	-0.0922456	0.0543946	-0.197121	-0.192041	-0.19183	-0.0135823	-0.369123	0.10313	-0.157929	-0.118487
TCGA-EA-A5FO-01A	-0.283853	0.188022	0.124555	0.454014	0.0487846	-0.0281878	-0.541822	0.277132	0.505511	-0.116766	-0.17157	0.0885983	0.0109549	-0.0707511	0.261564	-0.338211	0.383215	-0.546197	-0.511591	-0.268184	-0.107754	0.217131	-0.442716	0.200677	0.142775	0.298781	0.587552	0.347958	0.0350181	-0.473285	-0.526698	-0.0740212	0.250006	0.318227	0.29531	0.40074	-0.0212993	-0.0761159	-0.0608524	-0.461728	0.0831001	-0.495901	-0.377315	-0.074163	0.0431031	-0.550116	0.1509	-0.418326	-0.322855
TCGA-VS-A9UZ-01A	-0.352686	-0.322872	-0.177059	0.223884	-0.092594	-0.372433	-0.167312	-0.0511818	0.117675	-0.221	-0.160035	0.0655358	-0.0707534	-0.0729431	-0.0702323	-0.162694	0.216651	0.0847199	0.0058256	-0.145138	-0.020802	0.0529835	-0.192965	-0.197182	0.0281742	-0.0865679	0.113288	-0.424789	-0.349105	-0.416512	-0.258552	0.098403	0.195052	0.245131	-0.0727827	0.133902	-0.327313	-0.0959851	-0.122763	-0.264297	0.103986	-0.256933	-0.142231	0.309083	0.113969	-0.170945	0.215585	-0.109416	-0.169173
TCGA-EK-A2IP-01A	0.0158642	-0.0542848	-0.426663	-0.36448	-0.0926605	0.113702	-0.154816	-0.280987	-0.398679	-0.143185	-0.143306	-0.358027	-0.0837824	0.019872	-0.260675	0.0518705	-0.335932	-0.248415	-0.319685	0.113637	-0.0210271	0.0377638	-0.113785	-0.38225	-0.18981	-0.399518	-0.340432	-0.476391	-0.232976	0.328842	-0.128357	-0.101407	-0.370264	-0.427772	-0.136656	-0.403232	-0.0970001	-0.270464	-0.0552124	0.316779	-0.271583	0.217249	-0.0960964	-0.13528	-0.253243	-0.279927	0.122364	0.0196575	0.270668
TCGA-VS-A94W-01A	-0.00527146	-0.0952746	-0.29197	0.155352	0.154067	-0.0924679	0.361754	0.0242621	0.192013	-0.119644	-0.0941847	-0.189415	-0.205309	-0.14844	-0.178616	-0.0960851	-0.0563788	0.583567	0.45846	-0.0574265	0.0676255	0.0541808	0.0624882	-0.273883	0.0952199	-0.187616	-0.00180925	-0.326463	-0.316473	-0.113019	0.239839	-0.187847	-0.250793	-0.450842	-0.133775	0.0114294	-0.14318	-0.0900495	-0.109472	0.0206696	-0.017282	-0.114893	0.128058	-0.200347	-0.25843	0.440499	-0.146973	-0.00438966	-0.0741329
TCGA-DS-A1OB-01A	-0.175173	-0.208495	0.0340365	-0.190806	-0.124245	-0.46407	-0.0646596	-0.145741	0.0477196	-0.259162	-0.119105	0.0242474	-0.115358	-0.0338106	-0.0558208	-0.194941	0.0960066	0.468941	0.222109	-0.0740519	-0.188596	-0.078934	-0.077082	0.0961869	-0.00358768	0.245199	0.085153	0.291179	0.445436	-0.235768	-0.040917	-0.0577076	0.0826566	0.313824	-0.00444833	-0.0291882	-0.129045	-0.206745	-0.235695	0.235229	-0.0960054	-0.0877058	-0.0599976	-0.0419023	-0.0410527	-0.166735	0.208504	0.0343373	0.0410519
TCGA-EA-A410-01A	-0.450641	-0.342341	-0.0215003	-0.0703237	0.355606	0.236037	-0.357781	0.0669397	0.138676	-0.135633	0.0205657	-0.126754	-0.312049	-0.340242	-0.143211	-0.0342047	-0.224974	-0.577733	-0.497616	0.0558158	-0.335744	0.292645	-0.262996	0.23075	-0.138153	0.0526303	0.061157	0.199794	0.446041	0.215433	-0.437982	-0.137183	-0.243021	-0.142519	-0.164326	-0.344019	-0.324469	-0.0916184	-0.184109	0.28809	-0.219184	-0.07873	-0.171783	-0.212323	-0.213979	-0.343113	0.192081	0.0118456	-0.086866
TCGA-EX-A8YF-01A	-0.327403	-0.355251	-0.165568	-0.134438	-0.0147225	-0.171098	0.00316446	-0.158411	-0.34766	-0.160597	-0.013421	0.157905	-0.0889273	-0.101965	0.0959363	-0.286866	0.200457	0.285978	0.284832	-0.232031	-0.212986	-0.35038	0.0629879	0.144776	-0.113669	-0.123894	-0.268208	-0.318414	-0.248524	-0.44905	-0.234168	-0.0615071	0.0146312	0.429258	-0.164761	-0.11836	-0.315746	-0.0844679	-0.220107	-0.0169566	-0.0473452	0.0300329	-0.207193	0.124629	0.0748149	0.15388	-0.136472	-0.0144045	-0.157958
TCGA-VS-A9UV-01A	-0.225599	-0.0194536	0.351848	0.303866	0.00491042	-0.313363	-0.321941	0.226136	0.594029	-0.0257692	-0.018025	0.341053	-0.0526265	0.0746281	0.0413498	-0.183803	0.087578	-0.388247	-0.397529	-0.0931597	-0.0708618	-0.261031	-0.266661	0.313726	0.285202	0.418576	0.632147	0.534555	0.577479	-0.433412	-0.323016	-0.029795	0.354289	0.481983	0.0357578	0.317354	0.122962	0.27955	-0.35491	-0.294332	0.08814	-0.299106	-0.303963	-0.149307	0.102302	-0.444179	0.138077	-0.340471	-0.129232
TCGA-LP-A7HU-01A	-0.400918	-0.404391	-0.351981	0.0131542	-0.00734987	-0.262835	-0.354985	0.304215	0.37144	-0.18549	-0.35678	-0.0808443	-0.22531	-0.21536	-0.371664	0.0196232	-0.399967	0.193505	0.0926892	-0.339053	-0.36053	-0.0394902	-0.313179	0.123363	-0.197364	-0.207555	0.467645	0.519312	0.60915	-0.360868	-0.387479	-0.210551	-0.061951	0.440484	-0.234096	0.327094	-0.209827	-0.0235625	-0.284558	-0.430062	-0.240204	-0.300394	-0.202189	-0.159163	-0.147235	0.120179	0.0285832	-0.225536	-0.213824
TCGA-VS-A8EI-01A	0.150966	-0.20971	-0.0274054	-0.27697	0.0620908	0.0240688	0.160475	-0.21699	-0.408498	-0.0500378	-0.135094	-0.207222	-0.0243702	0.0962176	-0.291751	0.110949	-0.376967	0.4709	0.364081	0.115571	0.169315	0.078016	0.0922984	-0.200629	-0.235858	-0.180479	-0.451197	-0.30933	0.0172252	0.298137	0.365075	0.128174	-0.251092	-0.210167	-0.223516	-0.041489	0.0153791	0.0294469	-0.0421975	0.320629	0.0557161	0.13997	0.196938	-0.0841391	-0.181726	0.293324	0.111362	0.143587	0.257427
TCGA-BI-A0VS-01A	-0.0839847	0.156227	-0.0419324	0.155545	0.140051	0.132533	-0.162608	-0.0558154	-0.030936	-0.13964	0.0673369	-0.273786	-0.156132	-0.203309	0.100749	0.0486894	0.0860521	-0.516173	-0.391396	0.195308	-0.0616863	0.174521	-0.0428431	0.208769	-0.232471	-0.0478896	-0.126174	0.165095	0.240108	0.419866	-0.0887578	-0.225802	-0.32841	-0.391315	-0.101755	-0.496399	-0.0380504	-0.182639	0.144555	0.16154	-0.0990409	0.0496944	0.0616224	-0.152094	-0.113485	-0.0722121	0.0464005	0.0551055	0.136735
TCGA-DS-A0VM-01A	0.122008	0.121668	0.149057	-0.0365956	-0.223812	0.150031	0.0622642	0.221625	0.0351551	0.228275	0.157268	0.0553147	0.136034	0.284087	0.156624	0.32616	-0.044811	0.589279	0.398134	0.24965	0.16377	-0.138879	0.308139	-0.0397703	-0.0753584	0.249762	0.319116	0.307388	0.0918154	0.474376	0.103063	0.262603	0.217778	0.16883	0.28026	0.281288	0.243981	0.236545	-0.00889547	0.414266	0.12219	0.37409	0.0975317	0.0123633	0.067246	0.134137	0.00802316	0.14132	0.134904
TCGA-IR-A3LB-01A	0.344575	0.149176	0.0324012	-0.256334	-0.123556	0.389729	0.0308093	-0.316988	-0.514988	0.167632	0.153312	-0.236182	0.167029	0.134736	0.0103156	0.186175	-0.0732242	0.115554	-0.0055562	0.0548149	-0.0026562	0.102252	0.0856837	-0.274755	-0.264372	-0.308484	-0.559286	-0.552901	-0.624819	0.537719	0.0993603	0.13734	-0.281437	-0.442828	-0.0654234	-0.324311	0.0310144	-0.135514	0.317913	0.391877	-0.162412	0.344344	0.114338	0.0745042	-0.135588	-0.135927	-0.0966383	0.383043	0.0632961
TCGA-VS-A8EC-01A	-0.572417	-0.165583	-0.182007	0.187912	0.0417172	-0.259846	-0.59917	0.322132	0.456726	-0.322358	-0.162381	0.0556886	-0.266967	-0.109794	-0.220674	-0.277624	0.12211	-0.659939	-0.618074	-0.34094	-0.228219	0.111474	-0.483398	0.217958	0.02473	0.111634	0.525737	0.492614	0.386844	-0.508588	-0.541183	-0.172822	0.0568445	0.337195	-0.00126844	-0.0424781	-0.170614	-0.00451778	-0.203383	-0.412171	-0.00092964	-0.465467	-0.401758	-0.109335	-0.118096	-0.537627	0.240525	-0.489383	-0.0394389
TCGA-VS-A9V2-01A	-0.249171	-0.453545	-0.236387	-0.331396	-0.107534	-0.451194	0.104468	-0.0947625	-0.146068	-0.158591	-0.0280051	0.00787958	-0.0964472	-0.237155	-0.254822	-0.293898	-0.333671	0.522486	0.416505	-0.147103	-0.156466	-0.137798	0.0504821	-0.112832	-0.188726	-0.322626	-0.245896	-0.274173	0.14846	-0.434895	0.15446	-0.0569209	-0.143015	0.0884043	-0.36269	-0.0722742	-0.10327	-0.135948	-0.322898	-0.289177	-0.0360195	-0.0869506	0.010174	0.058756	-0.00551842	0.363025	-0.129644	-0.0114552	-0.057741
TCGA-IR-A3LA-01A	-0.44951	-0.342363	-0.412744	0.0479435	0.0773589	-0.366782	-0.382323	-0.27769	0.0469631	-0.312335	0.119142	0.116039	-0.0363571	-0.0894865	-0.123733	-0.235954	0.100896	-0.524506	-0.46137	-0.329337	-0.303749	0.0166431	-0.289673	-0.0561889	-0.296779	-0.307973	-0.0998406	-0.124756	-0.046837	-0.160868	-0.377591	-0.0404127	0.0566335	0.359653	-0.272672	-0.119483	-0.441652	-0.360521	-0.0103492	-0.133846	-0.0840389	-0.198639	-0.262604	-0.0410463	-0.0639676	-0.291575	0.256304	-0.121017	0.0107592
TCGA-C5-A7X8-01A	-0.296866	-0.152095	-0.287357	-0.329268	0.066785	-0.132102	-0.22005	-0.279526	-0.551834	-0.162871	-0.0534623	-0.257924	-0.0824556	-0.0302104	-0.198164	0.411511	-0.405442	-0.553654	-0.45193	0.264789	0.0980724	0.126902	-0.0580598	-0.436278	-0.356455	-0.500354	-0.549946	-0.659666	-0.650883	0.529203	-0.178449	0.0524349	-0.153818	-0.438168	-0.0261531	-0.281608	-0.33351	-0.227211	0.109654	0.372228	-0.20911	0.314192	0.024813	0.0931425	-0.130465	-0.184261	0.00460487	0.118654	0.259208
TCGA-EK-A2RL-01A	-0.492399	-0.289481	0.0299841	0.0781895	-0.275232	-0.0660355	-0.520558	0.322368	0.407909	-0.260281	0.0974284	-0.0381632	-0.229713	-0.139746	0.00526443	-0.244597	0.281821	-0.451685	-0.517801	-0.285184	-0.20184	-0.432417	-0.266485	-0.0158079	-0.151636	-0.13352	0.444397	0.170372	-0.291125	-0.341525	-0.476705	-0.204951	0.131119	0.27381	0.138636	-0.203006	-0.376485	-0.133634	0.0514889	-0.215823	-0.109346	-0.250927	-0.404583	0.0479564	0.0568439	-0.48695	0.201515	-0.317922	-0.168141
TCGA-C5-A0TN-01A	0.285054	0.168444	0.185676	-0.00167208	-0.126884	0.10061	0.0482234	0.264305	0.0803502	0.141722	-0.249928	-0.0639092	-0.198369	-0.216229	0.161085	-0.0413903	0.181856	0.389586	0.245799	0.184647	-0.00273525	-0.168354	0.194437	0.0912109	0.0199874	0.268314	0.140451	0.454048	0.423805	0.432278	0.0495335	-0.153921	-0.0986525	-0.0126138	0.0851905	0.129363	0.146235	-0.0449456	0.0611128	0.295989	-0.080171	0.22633	0.0970765	-0.302351	-0.222162	-0.108804	-0.0625258	-0.0200812	-0.176924
TCGA-FU-A57G-01A	0.135675	-0.0177817	-0.250586	-0.339661	0.263288	0.448158	-0.188457	-0.278486	-0.575262	-0.0979896	0.346126	0.0426578	-0.0964771	-0.272871	0.144062	0.126005	0.344192	-0.645716	-0.490118	0.164459	-0.187916	0.280272	-0.0396807	0.0695157	-0.22054	-0.334553	-0.626151	-0.303465	-0.393687	0.462463	-0.126004	-0.050025	-0.0861733	-0.0729221	-0.218536	-0.305766	-0.220911	-0.159381	0.339818	0.534474	0.0231473	0.23759	-0.0260836	0.0593937	-0.0291357	-0.387558	-0.200744	0.229936	-0.148012
TCGA-Q1-A73P-01A	-0.182645	-0.288408	-0.258943	0.0207285	-0.225077	-0.191232	-0.0335036	-0.046634	-0.286007	-0.0795503	-0.00485791	0.187892	0.103205	0.114124	0.177226	-0.210744	0.222454	0.31815	0.208359	-0.0730415	-0.102972	-0.0802575	0.175105	-0.285777	-0.100051	-0.312614	-0.202939	-0.389919	-0.46424	-0.29678	-0.00541993	0.251329	0.240852	0.218227	0.0482566	-0.0640298	-0.29352	-0.154339	0.144042	-0.261265	0.0564936	0.00609877	0.00515199	0.211044	0.167692	6.88412e-05	-0.00399776	0.0909317	-0.0981477
TCGA-C5-A1MP-01A	0.190882	-0.0982285	-0.0415749	-0.17984	0.160083	-0.0436841	0.33899	-0.193141	-0.321095	-0.0292756	0.0685529	-0.0563852	0.0326901	0.0842397	-0.237813	0.236503	-0.21889	-0.212715	0.0802516	0.0556957	0.22654	0.0962312	0.132958	-0.294781	-0.0472557	-0.351162	-0.287854	-0.421054	-0.475867	0.359199	0.270884	-0.00128463	-0.100288	-0.29266	-0.344483	-0.00599135	-0.083612	-0.157907	0.0117637	0.311593	-0.0989338	0.211091	0.125902	0.0407557	-0.0211681	0.385325	-0.202756	0.263591	0.0352909
TCGA-VS-A8EL-01A	0.273847	0.169297	-0.123768	-0.300578	0.0773493	-0.198723	0.446571	-0.296389	-0.367416	0.231474	-0.1444	-0.301131	0.0538891	0.144871	-0.396742	0.266732	-0.369991	0.495909	0.490454	0.211516	0.240938	0.242237	0.362417	-0.0626491	-0.111902	-0.194308	-0.347442	-0.413395	0.0052734	0.325368	0.440664	0.160035	-0.186214	-0.448389	0.0375264	-0.0347306	0.166759	0.124454	-0.200892	0.355421	-0.0574928	0.384402	0.300123	0.0362874	-0.299279	0.462292	-0.192162	0.258815	0.229088
TCGA-FU-A23K-01A	-0.189141	-0.159934	0.143878	-0.418105	-0.278528	-0.43359	-0.30101	0.374229	-0.0281093	-0.125849	-0.0351421	0.136298	-0.137691	0.0178767	-0.201484	0.127772	-0.461874	-0.0514084	-0.0802763	-0.289438	-0.348503	-0.309122	-0.0920046	0.037247	-0.203695	0.170295	0.243636	0.446226	0.582405	0.120078	-0.107795	0.122941	0.23463	0.453802	0.0174063	0.358614	-0.0797855	0.0930225	-0.238122	0.047334	-0.265353	0.018335	0.10507	0.0519129	-0.0160555	0.250047	0.213438	-0.0686939	0.145448
TCGA-C5-A1M5-01A	0.0252589	-0.145544	-0.101935	0.173278	-0.151154	-0.0851475	0.097579	0.138156	0.375929	-0.0827247	-0.239596	-0.0623525	-0.166657	-0.0450408	-0.104787	-0.177967	-0.245865	0.353591	0.31947	-0.104891	0.181533	-0.229274	0.0278257	-0.151224	-0.0386341	-0.141177	0.496686	0.166313	-0.0420936	-0.228414	0.0446418	-0.0476231	0.0597312	-0.113685	-0.265676	-0.370772	0.0194042	0.04419	-0.0518937	-0.230966	-0.0483879	-0.175672	-0.125162	-0.116674	-0.150415	0.30711	-0.0825703	-0.097782	-0.0667335
TCGA-EA-A44S-01A	-0.124492	-0.138022	-0.188378	-0.208435	-0.335486	-0.399812	-0.121922	0.145812	0.200901	-0.146699	0.0305219	0.0217826	-0.163752	0.0391657	-0.444724	-0.0297467	-0.160001	-0.167876	-0.0707286	-0.144072	0.130617	-0.0943252	-0.153008	-0.264725	-0.0452107	-0.111012	0.262091	-0.0940624	-0.301842	-0.352517	-0.161642	0.0278165	0.0393536	0.381749	-0.172762	0.0848771	0.0974163	-0.0114618	-0.373241	-0.0396936	-0.127209	-0.0749092	-0.191197	-0.0225322	-0.033065	0.0152251	0.0810423	-0.0477294	0.185145
TCGA-EA-A78R-01A	0.387166	0.303815	0.365843	-0.441754	-0.149463	-0.172986	0.26254	0.248254	-0.159142	0.285043	0.161154	0.175917	0.0452938	0.208486	0.11501	0.27417	-0.358099	0.514815	0.432582	0.146142	0.304942	0.0575059	0.253293	0.0811159	-0.00518596	0.355597	0.074017	0.392703	0.212783	0.452235	0.350696	0.316689	0.291656	0.415706	0.250166	0.412283	0.287887	0.303036	-0.211479	0.254904	-0.100245	0.421384	0.284634	0.141975	0.123842	0.302326	0.0689715	0.220181	0.274424
TCGA-C5-A7XC-01A	0.0916094	-0.240312	-0.368634	-0.11514	-0.0685041	0.0972959	0.192844	-0.382868	-0.296529	-0.161358	0.0911386	0.000194393	0.167727	0.0585064	0.133876	0.00884595	0.182476	-0.344883	-0.0525452	-0.124942	-0.157784	0.216287	0.0870214	-0.0700052	-0.0869649	-0.328393	-0.429031	-0.542252	-0.206454	0.207213	0.257099	-0.0074996	-0.227629	-0.402639	-0.322989	-0.232381	-0.21017	-0.252522	0.305103	0.166899	0.0546418	0.114253	0.0549638	-0.0988805	-0.156029	0.036559	-0.16427	0.238913	0.0506572
TCGA-VS-A9V4-01A	-0.32461	0.0401157	0.14632	-0.0442618	0.127224	-0.271788	-0.215856	-0.028302	-0.0120486	-0.142928	0.130355	0.196555	-0.0970464	-0.11552	-0.0702378	-0.0958179	0.113271	-0.495614	-0.543713	-0.050536	-0.26618	-0.0831876	-0.216637	0.324243	-0.0656426	0.259625	-0.0393716	0.349815	0.518577	-0.313687	-0.256485	0.131961	0.260675	0.26843	0.229774	-0.261237	-0.27746	0.00134265	-0.167163	0.0704362	-0.0664623	-0.00735745	-0.145515	0.153898	0.110661	-0.394193	-0.0462776	-0.102046	-0.0777144
TCGA-EK-A2RA-01A	0.136466	-0.130296	-0.0646007	0.0710907	-0.153136	0.124894	0.219707	0.0489702	0.314603	0.13166	-0.0103625	-0.183046	-0.175832	0.0176703	0.0198399	-0.28791	-0.287703	0.547673	0.500637	-0.176369	0.0193738	-0.184965	0.0846892	-0.0919748	-0.0177345	-0.124936	0.315132	0.253736	-0.238983	-0.461356	0.215954	-0.0930087	-0.051011	-0.037652	-0.132328	0.0364377	0.225951	-0.0935502	-0.221123	-0.417748	-0.102443	-0.146688	0.103651	-0.113854	0.0234998	0.45969	0.216439	0.0570665	0.0702093
TCGA-EX-A1H5-01A	-0.361544	-0.130345	0.0430591	0.318226	0.0886574	-0.168526	-0.406712	0.314124	0.42594	-0.163731	-0.294501	-0.117258	-0.320801	-0.189868	-0.0916576	-0.148089	0.0290942	-0.276679	-0.363971	-0.184531	0.0262871	-0.252609	-0.405967	-0.124268	-0.0153289	-0.0673547	0.492156	0.301326	0.107818	-0.2764	-0.426143	-0.23956	0.0545864	0.101299	-0.0308572	0.0363169	-0.0417839	-0.0882303	-0.207975	-0.466387	-0.0394024	-0.281497	-0.289763	-0.0723595	0.0598144	-0.466082	0.263963	-0.386607	-0.190096
TCGA-VS-A953-01A	0.388942	0.344096	0.283436	0.370404	0.223713	0.267916	-0.0184254	0.0935718	0.525774	-0.0104565	0.0526781	-0.117783	-0.0463656	0.019594	0.121615	-0.30442	0.0622684	-0.246424	-0.0846008	-0.0698018	-0.169011	0.0952639	-0.0113173	0.421863	0.142379	0.417622	0.562132	0.546094	0.616861	-0.0948385	0.0765474	-0.161978	-0.0905655	0.100584	0.100084	-0.0364054	0.199936	0.200901	-0.000567766	-0.17825	0.0460915	-0.14822	-0.0650046	-0.323111	-0.0561394	0.00171538	0.20547	-0.188892	-0.225316
TCGA-MA-AA3Z-01A	0.0720266	-0.0453343	-0.00747168	0.251995	-0.127335	0.0229384	0.0220313	0.0664452	0.323345	0.00952353	-0.202526	-0.0909799	0.0209395	0.115545	0.199744	-0.293031	0.271026	0.54703	0.488981	-0.147757	-0.00486172	-0.311051	0.0595971	0.199623	0.207117	0.173877	0.242357	-0.0296348	-0.349249	-0.52226	0.00315756	-0.0379981	0.00238702	-0.127545	0.0637561	-0.0390432	0.298607	0.284996	-0.291788	-0.515431	0.201931	-0.374798	-0.00275519	0.0706086	0.0689095	0.226195	0.0974013	-0.345598	0.107006
TCGA-VS-A959-01A	-0.368886	-0.300853	-0.371841	-0.00824523	0.0110239	-0.440892	-0.0077935	-0.370674	-0.303294	-0.268593	0.0267255	-0.0988628	0.0857376	-0.162538	-0.128555	0.106224	-0.0990495	-0.226113	-0.185176	-0.249906	0.121524	-0.0633896	-0.138938	0.0258762	-0.137907	-0.339922	-0.368844	-0.495744	-0.263897	-0.238192	-0.255505	-0.094994	-0.284285	-0.454392	-0.260991	-0.172009	-0.309015	-0.19939	-0.195601	-0.328243	-0.157558	-0.103304	-0.266379	0.161965	0.0168936	-0.106999	-0.146315	-0.0767878	0.173874
TCGA-FU-A3EO-01A	-0.0147866	-0.0998223	0.0330157	-0.464296	-0.361917	-0.306977	-0.212252	0.078138	-0.503265	0.0432424	0.043419	0.148126	0.169242	0.279051	-0.156797	0.155533	-0.327013	-0.22992	-0.292735	-0.0556737	0.023778	-0.0853456	0.0726215	-0.414096	-0.265121	-0.33508	-0.372662	-0.278718	-0.233069	0.0895214	-0.0453929	0.14557	0.252697	0.440785	0.106365	0.287107	0.0298706	0.00638706	-0.227546	0.0939278	-0.122433	0.380042	0.07098	0.217083	0.0350218	0.017934	0.0458733	0.203166	0.246415
TCGA-BI-A20A-01A	-0.122478	-0.293575	-0.166831	-0.0171519	0.0159455	-0.157123	0.265337	-0.0184947	-0.181181	0.051506	-0.0227994	0.302427	-0.0328087	-0.0667815	-0.170669	-0.0504957	-0.165527	0.503653	0.408432	0.0665362	0.412581	-0.241772	0.0803728	-0.365932	-0.035753	-0.0726039	-0.00667899	-0.348221	-0.329468	-0.172335	0.0823382	0.084427	0.0203185	0.373833	-0.15964	0.0945999	0.0714931	-0.0925299	-0.0137137	-0.0767203	-0.0398922	0.0519478	0.0860381	0.262194	0.228998	0.306459	-0.0989438	0.114318	0.195096
TCGA-DS-A1OD-01A	0.33439	-0.254033	-0.349885	-0.192666	-0.133909	0.0711187	0.422021	0.0471633	-0.297384	0.107069	-0.294017	-0.253218	-0.303438	-0.186015	-0.162896	0.118587	-0.285893	0.411223	0.399879	-0.0315979	0.140888	-0.282667	0.182704	-0.30962	-0.0636529	-0.378986	-0.120684	-0.30155	-0.463039	0.102882	0.22774	-0.0698288	-0.257674	-0.296093	-0.390247	-0.176602	-0.071143	-0.143116	0.0911339	0.110617	-0.261928	-0.0149307	0.240317	-0.0666078	-0.108773	0.505088	-0.0133591	0.111411	0.129169
TCGA-C5-A1M9-01A	-0.148205	-0.0456063	-0.194287	0.416673	-0.233321	-0.0327142	-0.0861984	0.371407	0.544349	0.0697497	-0.244294	0.19219	0.00208639	0.0153202	0.134801	-0.186649	0.336341	0.066974	-0.0159023	-0.021509	-0.118181	-0.298408	-0.00888754	0.351134	0.143195	0.303903	0.566238	0.59721	0.628712	-0.0333244	-0.155362	-0.125507	0.116399	0.288263	0.210546	-0.200745	-0.141636	0.00344161	0.0145107	0.202566	-0.0149564	-0.0743843	-0.187927	-0.237864	-0.038282	-0.119782	0.156285	0.0283609	-0.200935
TCGA-VS-A8Q8-01A	0.522925	0.0924723	0.222686	-0.395795	0.149473	0.0896877	0.476407	-0.356311	-0.507814	0.229839	-0.0278508	-0.200375	0.195469	0.221479	-0.0681649	0.161181	-0.381635	0.628203	0.553602	0.191996	0.419755	0.214873	0.36775	-0.404658	-0.20761	-0.310633	-0.592476	-0.568734	-0.495201	0.260332	0.423779	0.0972549	-0.12226	-0.350286	-0.160842	-0.080989	0.312951	-0.00353374	-0.15544	0.286241	0.0529733	0.381671	0.244772	-0.108382	-0.247334	0.449837	-0.130563	0.31678	0.390425
TCGA-Q1-A6DV-01A	0.263523	-0.334532	-0.246058	0.247593	-0.0274719	0.12984	-0.0656225	0.231549	0.300406	-0.103121	-0.18615	-0.276615	-0.0113339	-0.0689296	-0.0212324	-0.244496	-0.190494	-0.532151	-0.458193	-0.35021	-0.210784	-0.337478	-0.330256	-0.298436	-0.257283	-0.346043	0.393033	-0.196801	-0.365978	-0.364059	-0.175385	-0.237501	-0.180532	-0.1725	-0.198648	-0.274873	-0.297206	-0.181181	-0.0119077	-0.480916	-0.0818251	-0.381468	-0.172894	0.0861814	-0.210248	-0.367603	0.201438	-0.101628	-0.0674859
TCGA-EK-A3GK-01A	-0.229266	-0.181224	0.0229568	0.338111	-0.29616	-0.0719721	-0.151782	0.1795	0.312328	-0.0296379	-0.274432	-0.0566621	0.112718	0.0720519	0.133164	-0.0849532	0.169504	-0.0560717	-0.0719086	-0.2285	0.0441484	-0.424487	0.00617107	-0.0324868	0.0478402	-0.030241	0.324936	0.175116	0.313938	-0.510553	-0.24381	-0.0467832	-0.0442978	-0.140383	-0.0786506	-0.0191643	-0.0304628	-0.066324	0.0515234	-0.487541	0.0902003	-0.275482	-0.218916	-0.102146	-0.0358859	-0.132384	0.118809	-0.102468	0.0979048
TCGA-IR-A3LF-01A	-0.510809	-0.449535	-0.341547	-0.0803898	-0.286413	-0.336142	-0.352622	-0.313556	-0.210428	-0.353002	-0.139623	-0.263288	-0.233183	-0.210796	-0.294895	-0.227112	-0.253826	-0.0577148	-0.257295	-0.267799	-0.179464	0.0431155	-0.251697	-0.486596	-0.278578	-0.489305	-0.217865	-0.553534	-0.561761	-0.35941	-0.321125	-0.120333	-0.115994	-0.374295	-0.33966	-0.534411	-0.414512	-0.360248	-6.45e-05	-0.29777	-0.187386	-0.15734	-0.222032	0.170919	-0.240299	-0.239504	0.0349068	0.00987892	-0.134111
TCGA-C5-A1M7-01A	0.451588	-0.137201	0.315224	0.0789343	0.175514	0.174123	0.417278	-0.193078	0.173394	0.132318	-0.30926	-0.169214	-0.0117078	-0.0710787	0.289066	-0.191849	0.17465	-0.0606619	0.2186	0.18683	-0.000859392	-0.262771	0.0969812	0.222744	0.186935	0.197424	0.0227212	0.355897	0.402018	-0.0723786	0.393815	-0.00218858	0.000977928	-0.265459	-0.154858	0.018631	0.0823434	-0.00537749	0.150817	-0.0364786	-0.0607238	-0.0574503	0.0914682	-0.143913	-0.0114809	0.243534	-0.0515331	0.198293	-0.128514
TCGA-LP-A4AU-01A	0.384865	0.261337	0.196749	-0.22137	-0.0868789	0.0305971	0.113402	-0.420029	-0.374897	0.0852578	-0.049257	0.140275	0.367084	0.217208	0.241142	0.0093792	0.196065	0.399371	0.303768	0.120835	0.20433	0.223583	0.203538	0.178128	-0.111	0.0403788	-0.486137	-0.294128	0.138233	0.339246	0.172116	0.317975	0.0801106	-0.0390105	0.181766	0.173916	-0.0224624	0.0778227	0.0937695	0.350025	0.0375806	0.369705	0.136251	0.134441	-0.0505269	0.0532204	-0.149321	0.265221	0.141124
TCGA-VS-A94Z-01A	-0.00718728	-0.249252	-0.343698	0.302239	0.139585	0.0746789	0.317759	-0.226107	0.426761	0.0364606	-0.0447289	-0.128198	-0.154005	-0.0984691	-0.0418311	-0.302766	0.0174988	0.614984	0.519805	0.0265297	0.0236862	-0.0171001	0.230158	0.0587187	0.353011	0.0495723	0.238595	0.107894	0.236209	-0.130157	0.310758	-0.145841	-0.163404	-0.241145	-0.11856	-0.162461	-0.0469189	0.110142	0.0368741	0.143164	0.0299317	-0.074799	0.259626	-0.204605	-0.142272	0.454092	-0.0703401	0.191091	-0.0364836
TCGA-JW-A852-01A	-0.282789	0.146783	0.295098	-0.456708	-0.172975	-0.502468	-0.201542	0.233554	-0.275227	-0.0701504	-0.188098	0.0539686	-0.0428885	0.2188	-0.282827	0.129683	-0.49467	0.330422	0.0245712	-0.0549208	0.228556	-0.147444	-0.119655	-0.20962	-0.134695	0.0534788	-0.133986	-0.0302207	0.202921	-0.265773	-0.0759109	0.20477	0.244954	0.362399	0.193466	0.554236	0.149877	0.249641	-0.467116	-0.24909	-0.0795799	-0.0403716	-0.0513195	0.123462	-0.00293285	-0.0557641	0.0951975	-0.240267	0.297479
TCGA-VS-A9V5-01A	-0.392722	-0.304765	-0.0706919	-0.0301023	-0.0114722	-0.153149	-0.404469	-0.371998	-0.243915	-0.280756	-0.136825	0.0269434	-0.0194674	-0.0883301	-0.207092	-0.0164035	0.0129595	-0.312408	-0.404841	-0.133004	-0.0501848	-0.034113	-0.295612	-0.230386	-0.312971	-0.344648	-0.285437	-0.595804	-0.636367	-0.17467	-0.373031	0.109672	0.0817588	-0.148125	-0.0947336	-0.41627	-0.261355	-0.250398	0.0298637	0.146397	0.00444303	0.0149093	-0.25776	0.300576	0.0759663	-0.500807	-0.00434384	0.0066624	0.0873357
TCGA-C5-A3HE-01A	-0.0683246	-0.0623257	0.0104672	-0.336941	-0.191089	-0.327438	0.230722	-0.105272	-0.0715625	-0.192014	-0.168918	0.0280803	0.032822	0.0704872	-0.146628	-0.0211322	-0.273873	0.328714	0.364246	-0.195033	0.0935404	-0.172601	0.148311	0.249029	-0.0552939	0.139879	-0.0453966	0.407171	0.598272	-0.155858	0.126175	0.149576	0.0110852	0.215089	0.0806133	0.216163	-0.145126	0.158282	-0.208109	0.100708	-0.216309	0.142908	0.0531736	-0.112815	-0.0406931	0.438316	-0.0946606	0.208543	0.0689405
TCGA-FU-A5XV-01A	0.385715	0.304175	0.00798971	0.204628	-0.0422158	0.360833	0.26961	-0.272507	-0.186686	0.245141	-0.160633	0.113178	0.356693	0.272238	0.331826	0.0239104	0.220591	-0.360146	-0.215048	0.105013	0.155429	0.092945	0.160193	-0.126127	0.108023	0.147803	-0.311158	-0.290116	-0.194256	-0.00925604	0.289164	0.154293	0.118724	-0.101643	0.132079	-0.196959	0.290079	0.0545369	0.262073	-0.0545567	0.23614	0.140638	0.142245	-0.0164419	0.050645	-0.173254	-0.117078	0.0847162	0.318887
TCGA-EA-A43B-01A	0.33457	0.230874	0.00576628	-0.38014	0.0726467	-0.216037	0.428395	-0.0501639	-0.310429	0.185676	0.0808744	-0.0414492	0.177486	0.15263	-0.0704723	0.348087	-0.483869	0.56805	0.480682	0.340259	0.177374	0.227955	0.302832	-0.0267962	-0.0892692	-0.0741113	-0.234526	-0.0110087	0.152981	0.454518	0.361042	0.249714	-0.147057	-0.0916323	0.0958362	0.222679	0.256761	0.181378	-0.184233	0.378313	-0.122249	0.431309	0.25389	0.0675031	-0.0777563	0.419721	-0.0148303	0.243906	0.349842
TCGA-MA-AA42-01A	0.319453	0.0755436	0.0469416	-0.415308	-0.164324	-0.266616	0.52524	0.18351	-0.445129	0.241416	0.0401831	0.334611	-0.0693448	0.00731884	-0.229993	-0.210759	0.228324	0.560194	0.569235	-0.121796	0.203218	-0.135345	0.381944	-0.277002	0.0214305	0.104832	-0.383928	-0.295367	-0.460267	-0.269855	0.439148	0.278354	0.309697	0.533147	0.0438407	0.422397	0.258634	0.210463	-0.364039	-0.00195606	0.203215	0.252236	0.30374	0.33609	0.233613	0.61635	-0.105588	0.202843	0.0663487
TCGA-VS-A9UJ-01A	-0.123291	0.230057	-0.0515972	0.35431	0.237729	0.492131	-0.429072	0.0441891	0.0126202	-0.0876978	0.250381	-0.032166	-0.0689164	-0.189839	0.0271915	-0.0760886	0.183267	-0.698583	-0.626251	0.0456249	-0.151194	0.361761	-0.358009	0.0424573	0.0414079	0.0276651	-0.275439	-0.00130729	0.0778009	0.1791	-0.402026	-0.0797791	-0.0749335	-0.179224	0.307307	-0.027266	-0.180822	-0.123037	0.219997	0.198943	0.0414054	-0.113748	-0.11309	-0.00726588	0.0258929	-0.616484	-0.0909891	-0.167359	-0.304437
TCGA-VS-A9V1-01A	-0.155567	0.0142764	0.234826	-0.146291	-0.0826607	-0.26286	-0.197854	0.0360132	-0.33368	-0.275668	-0.210297	0.0574498	0.0134776	-0.0659121	0.118661	-0.209602	0.10442	-0.317239	-0.232842	-0.240608	-0.0972351	-0.213841	-0.152609	0.233536	-0.205219	0.00221996	-0.33638	-0.400383	-0.181735	-0.364045	-0.112445	0.103266	0.0881143	-0.0207789	0.148806	-0.205116	-0.385971	-0.11091	-0.189749	-0.0474084	0.0407298	-0.22074	-0.154766	0.127651	0.136697	-0.331055	-0.0428338	-0.116057	-0.119002
TCGA-JW-AAVH-01A	-0.411007	-0.1407	-0.125171	0.239546	-0.0568307	-0.363389	-0.445564	-0.123351	0.245029	-0.150054	0.0698409	-0.0297979	-0.0897359	-0.0344656	0.0147465	-0.119188	-0.206298	-0.47012	-0.493073	-0.222492	-0.106211	-0.250853	-0.395302	-0.40926	-0.0982118	-0.277806	0.251967	-0.276762	-0.251879	-0.531958	-0.442647	-0.0188308	0.241235	0.310505	-0.0326837	-0.125168	-0.0287655	-0.244882	-0.267943	-0.435696	-0.0432603	-0.11846	-0.376991	0.128455	0.143269	-0.457261	0.125784	-0.409278	0.187939
TCGA-VS-A8EJ-01A	-0.47242	-0.258793	-0.00220328	-0.401183	-0.0921816	-0.361144	-0.315518	0.0887033	-0.434618	-0.285183	-0.147941	-0.0714522	-0.251476	-0.203915	-0.359554	0.0818093	-0.493766	-0.116432	-0.309672	-0.103959	-0.0878923	0.000306409	-0.233073	-0.446194	-0.425518	-0.3347	-0.331588	-0.142415	-0.206406	-0.277924	-0.32309	-0.0727495	0.0343083	0.0488839	-0.189808	-0.161597	-0.410392	-0.130613	-0.398243	-0.204047	-0.191473	-0.00667104	-0.245429	0.141358	0.051524	-0.207336	-0.00276076	-0.211073	0.226884
TCGA-DS-A1O9-01A	0.446784	0.359459	0.258479	-0.151232	-0.0524198	0.454639	0.467279	-0.124226	0.0685934	0.329396	0.181718	0.138166	0.123694	0.133834	0.224609	0.0162632	0.403996	0.632993	0.620429	0.18458	0.32467	-0.0187353	0.360052	-0.0684347	0.295803	0.437388	0.0770773	0.000216288	-0.319906	0.528807	0.451125	0.301957	0.0939503	-0.0700065	0.27399	0.539513	0.284213	0.253229	0.235176	0.458612	0.131276	0.216374	0.326385	0.215969	0.13957	0.453208	0.0300979	0.334543	-0.0973533
TCGA-VS-A8QA-01A	-0.476509	0.0594183	-0.373482	0.402142	-0.286778	-0.402949	-0.355927	0.248657	0.457861	-0.202624	-0.048593	-0.0572995	-0.29644	-0.190621	-0.0186503	-0.161062	0.183134	0.236985	-0.0774527	-0.279708	-0.118088	-0.234287	-0.246467	0.0875277	0.16621	0.245917	0.567281	0.128281	-0.17147	-0.525822	-0.431737	-0.256014	0.142224	0.31176	0.212276	0.232202	-0.224774	-0.0814242	-0.230676	-0.46596	0.0387987	-0.421619	-0.334908	0.0556396	0.0540224	-0.30442	0.185748	-0.408446	-0.181354
TCGA-XS-A8TJ-01A	-0.35175	-0.295096	-0.240748	-0.104956	-0.235197	-0.39348	-0.045902	-0.359579	-0.294777	-0.202074	-0.277929	-0.268752	-0.0514233	-0.0478019	0.00314618	-0.0478937	-0.170516	-0.254821	-0.0619489	-0.0159943	0.135707	0.0696376	-0.0945331	-0.405956	-0.23726	-0.413975	-0.377758	-0.530446	-0.498999	-0.303581	-0.107863	0.0623211	-0.0192503	-0.350472	-0.234821	-0.344624	-0.0441587	-0.257991	-0.0507233	-0.254453	0.00857863	-0.0788767	-0.204112	-0.113761	-0.0256314	-0.104425	-0.135856	-0.0714457	0.140517
TCGA-C5-A1ME-01A	0.0231649	-0.122742	-0.00743447	-0.445571	-0.224545	-0.250456	-0.126532	0.138915	-0.509816	0.0606978	0.046256	0.177124	0.203538	0.279024	0.0101583	0.130109	-0.381569	-0.338349	-0.283088	-0.100217	0.00547611	-0.0927821	0.0304496	-0.152351	-0.18916	-0.276352	-0.423627	-0.0960614	-0.0358883	0.0211596	0.0352343	0.236338	0.218674	0.410936	0.0621779	0.258029	-0.0569454	0.0560656	-0.213416	0.0711774	-0.183475	0.258948	0.227603	0.130333	0.0925615	0.00130869	-0.0919727	0.264951	0.126507
TCGA-GH-A9DA-01A	0.557995	0.376847	-0.0753238	0.415613	0.2967	0.31993	0.438718	0.19618	0.360957	0.320872	0.219798	-0.0514699	0.239482	0.094275	0.372766	0.110503	0.0924293	0.181274	0.247193	0.375241	0.370474	-0.0524235	0.23809	0.323668	0.270083	0.321507	0.252757	0.466693	0.389808	0.500599	0.447472	-0.0686236	-0.240735	-0.208455	0.0705253	-0.0560282	0.297241	0.169461	0.222177	0.452913	0.00874589	0.305464	0.300962	-0.261297	-0.102763	0.31618	-0.114628	0.13913	-0.189635
TCGA-VS-A9U6-01A	-0.176332	0.182308	-0.237299	0.0191011	0.462186	0.0633305	-0.0176965	-0.313486	-0.169642	-0.140744	0.186804	-0.137621	-0.0452521	-0.198381	-0.148389	0.133845	-0.0734599	-0.107983	-0.14901	-0.0320978	0.0666643	0.210434	-0.023763	-0.13101	0.0340996	-0.0848414	-0.278583	-0.316414	-0.240065	0.221328	0.0530954	-0.314098	-0.321189	-0.48081	0.036875	-0.238001	-0.207709	0.112736	0.162925	0.293746	0.120251	-0.134484	-0.155554	-0.171358	-0.0184991	0.0175372	-0.130169	-0.0457766	0.122633
TCGA-DS-A1OA-01A	0.176747	-0.0432694	0.0161343	-0.235107	-0.18222	0.18021	0.0584022	-0.167562	-0.306007	0.141286	-0.106865	-0.150117	-0.000500911	-0.0566177	-0.00501047	0.0367131	-0.265968	0.170102	0.360454	0.00411268	0.102067	-0.211457	0.124906	-0.166828	-0.103215	-0.186125	-0.238397	-0.211572	-0.378054	0.139218	0.141879	0.00179483	-0.135985	-0.243376	-0.261174	-0.207237	0.219318	-0.0982022	0.116269	-0.166292	-0.169719	0.15846	0.0823913	0.00248369	-0.125973	0.324755	-0.207388	0.24718	0.0894192
TCGA-HG-A2PA-01A	0.474622	0.163976	0.00862679	-0.140656	-0.121304	0.222371	0.319643	-0.41283	-0.383523	0.29295	0.034711	-0.0240465	0.319577	0.226696	0.232346	0.0716893	0.240245	0.0223107	0.0557328	0.178275	0.0926427	0.397109	0.247047	-0.0550356	0.0539409	-0.0747629	-0.44446	-0.577086	-0.678518	0.402293	0.363041	0.290002	0.0313737	-0.425375	0.0880254	0.312291	0.108945	0.0679129	0.259813	0.432457	0.218443	0.360486	0.315423	0.254856	-0.104529	0.0773206	-0.0379082	0.354191	0.0872203
TCGA-EA-A3QD-01A	-0.245272	-0.260159	-0.156331	-0.39056	-0.356637	-0.553504	0.308597	0.0340956	-0.33577	-0.0639057	-0.31095	-0.0584796	-0.332243	-0.234236	-0.377203	0.0800888	-0.47144	0.585182	0.482751	-0.202967	-0.104171	-0.0657029	0.152657	-0.297163	-0.233023	-0.238418	-0.236522	-0.0456982	0.170457	-0.0424193	0.249982	-0.0939398	-0.0692393	0.186601	-0.271076	0.0810296	-0.139949	-0.201972	-0.335212	-0.140948	-0.213702	0.112672	0.131677	-0.0693432	-0.169169	0.520071	-0.0281867	0.106441	-0.0419429
TCGA-C5-A7UC-01A	0.432406	0.229633	0.271484	0.35495	0.148393	0.314869	-0.0816543	0.165813	0.38758	0.197268	0.198972	0.0928161	0.229091	0.0626051	0.394211	0.00501074	0.235336	-0.407176	-0.276384	0.29391	0.0241277	0.172019	-0.0380131	0.347503	0.151239	0.327671	0.278173	0.484581	0.588662	0.390071	0.00367295	-0.0538925	-0.0603005	-0.132747	0.176755	0.0395789	0.182408	0.0991275	0.275671	0.358696	0.0121373	0.153185	0.0156943	-0.204445	0.0398246	-0.349671	-0.0462375	-0.00822549	-0.183824
TCGA-MA-AA43-01A	0.238726	0.128302	-0.156694	0.0212265	0.33021	0.354459	0.193376	-0.0996452	-0.139878	0.0556766	0.210182	-0.170732	0.105488	-0.0208551	0.184332	0.20356	0.163459	-0.542052	-0.415163	0.339939	0.267001	0.46446	0.0214559	0.0319055	-0.154739	-0.24653	-0.283343	-0.148751	-0.289332	0.607344	0.183229	0.0479778	-0.249352	-0.353383	0.0502086	-0.19206	-0.0324645	0.087935	0.382832	0.595228	-0.0936567	0.185233	0.211067	0.00806917	-0.264956	-0.267316	-0.117132	0.187943	0.067802
TCGA-PN-A8MA-01A	-0.504392	-0.363374	-0.293502	-0.00314259	0.116719	0.0633921	-0.356809	-0.0296264	0.241686	-0.344367	-0.154456	-0.271668	-0.287554	-0.301009	-0.130442	-0.0867502	-0.0616968	-0.475421	-0.386675	-0.261174	-0.253022	0.185945	-0.352859	-0.253892	-0.242585	-0.349226	0.284501	-0.155456	-0.319003	-0.220419	-0.444357	-0.218678	-0.169343	-0.395146	-0.250572	-0.395137	-0.411616	-0.329985	-0.0524749	-0.0648284	-0.129673	-0.334125	-0.36112	0.0556043	-0.1417	-0.227941	0.21239	-0.237257	-0.108542
TCGA-C5-A2LV-01A	0.201825	0.225262	0.309693	-0.0814645	0.0790313	0.124757	0.194138	0.417334	0.348237	0.150859	0.064806	0.125086	-0.0362015	0.0265504	0.240564	0.152963	0.0872325	0.2341	0.219303	0.186692	0.139777	0.0445518	0.152232	0.275092	0.0660279	0.441796	0.448403	0.591132	0.556031	0.484433	0.285032	0.0593585	0.0671213	0.374872	0.237697	-0.034347	0.138106	0.0318771	0.0874561	0.387891	-0.00161986	0.188581	0.0846487	-0.288487	-0.145036	0.354303	0.169849	0.0531416	0.0202057
TCGA-VS-A9UQ-01A	-0.479807	-0.333466	0.088279	0.153427	-0.0192126	0.119617	-0.400876	-0.0497775	-0.181156	-0.183079	0.099974	-0.0988792	0.135313	0.052399	-0.0347732	0.044348	0.053371	-0.452697	-0.462636	-0.0490392	-0.0695238	0.0399743	-0.264753	-0.316207	-0.151038	-0.351079	-0.255453	-0.526985	-0.55113	0.184183	-0.36958	-0.129031	-0.214396	-0.384512	-0.0582078	-0.328816	-0.255489	-0.245399	0.264012	-0.194074	-0.030786	-0.121264	-0.294881	0.212161	-0.0106691	-0.456244	0.0737236	-0.162945	-0.135861
TCGA-MY-A5BF-01A	0.267124	0.344872	0.243177	0.255783	-0.046999	0.301915	0.251953	0.00869049	0.403866	0.128666	-0.350827	0.107841	0.0554821	0.166215	0.311958	-0.208065	0.358919	0.398518	0.416899	-0.102519	-0.0173058	0.14596	0.16902	0.117388	0.286598	0.331167	0.518647	0.423684	0.226573	-0.271707	0.209833	-0.0183573	0.298029	0.335367	0.144845	0.0812883	0.237689	0.122744	-0.0584555	-0.270608	0.232346	-0.151446	0.190592	-0.029266	0.230015	0.372875	0.178802	-0.0157009	-0.0575147
TCGA-JX-A3Q8-01A	0.150496	-0.0646114	-0.0333261	-0.245876	-0.00891843	-0.204654	0.0449023	0.33183	0.0814846	0.105521	-0.101233	0.161072	0.0283229	0.117568	-0.10887	-0.0183564	0.0183513	0.120167	0.0821206	-0.201347	-0.0665636	-0.325296	0.0434798	-0.0745215	-0.111642	-0.0718167	0.318449	0.058432	-0.415976	-0.212483	-0.046884	0.0985188	0.292953	0.407848	0.0562021	0.384892	-0.21154	0.12111	-0.222417	-0.151407	0.122036	-0.0657458	0.0778123	0.153209	0.00889264	0.1875	0.241088	-0.0595608	-0.0985056
TCGA-VS-A9UM-01A	-0.208571	-0.0935873	-0.308826	0.260824	0.195031	-0.0787395	0.237162	-0.342633	0.036525	-0.00131704	0.15304	-0.147166	0.0795386	-0.0242994	-0.275414	0.0628516	0.0265778	0.182226	0.120934	0.109419	-0.00277289	0.138141	-0.0214537	-0.227721	0.0520005	-0.33061	-0.231265	-0.585137	-0.575255	0.063625	0.0035135	-0.114365	-0.169073	-0.467468	-0.173668	-0.13636	0.0611887	-0.127882	-0.0869102	0.198912	0.126977	-0.0305145	0.0655067	0.00490263	-0.0525019	0.0742315	-0.15848	0.0658503	0.0685604
TCGA-VS-A8EH-01A	-0.359182	-0.0400999	0.0742031	-0.296611	0.289885	-0.0688199	-0.457148	-0.0745173	-0.40149	-0.201911	-0.0261326	-0.000657171	0.0597013	-0.0224218	0.00156668	-0.0144397	-0.0696194	-0.555652	-0.488646	-0.211416	-0.0357907	-0.331853	-0.278667	-0.168781	-0.333967	0.00254602	-0.473125	-0.286815	-0.156441	-0.321549	-0.330426	0.112865	-0.0253762	-0.251055	0.038876	0.253539	0.210587	0.0754341	-0.150607	-0.302414	0.215076	-0.071316	-0.274815	0.227901	0.10824	-0.482517	-0.0404844	-0.34984	0.151033
TCGA-LP-A4AW-01A	0.0910374	0.00101584	0.0602286	-0.163397	0.059884	0.253078	-0.0463191	-0.0359321	-0.201844	-0.0230147	-0.159276	0.120284	-0.0738653	0.0241501	-0.0713605	0.379584	-0.203824	-0.631852	-0.479464	0.319475	-0.0323666	0.011423	-0.142632	0.0753115	0.0239337	0.0365982	-0.334393	0.167201	0.375593	0.526301	-0.119893	-0.0343525	-0.0739227	0.092296	-0.138487	-0.225985	-0.107501	0.208326	0.349322	0.379307	-0.154914	0.201805	0.0439218	-0.22121	-0.123171	-0.37763	-0.112459	0.002195	-0.147587
TCGA-C5-A1MJ-01A	-0.410374	-0.363256	-0.412463	0.12855	0.161062	-0.0516209	-0.316765	-0.0695318	0.250747	-0.306466	0.0978284	0.0641256	-0.166261	-0.241835	-0.111047	0.0188204	-0.0903933	-0.551397	-0.476352	-0.0824094	-0.331945	0.0512254	-0.269797	0.0254076	-0.218341	-0.0683367	0.353962	0.430812	0.594193	0.308616	-0.226988	-0.0865445	-0.0161471	0.0435152	-0.084702	-0.168144	-0.390982	-0.158318	0.23884	0.244187	-0.205912	-0.034104	-0.19929	-0.00110258	-0.0857984	-0.238233	-0.120867	0.198443	-0.295822
TCGA-UC-A7PD-01A	0.403235	0.344008	-0.036352	0.138736	0.0434722	0.0911791	0.149593	0.00852938	0.168014	0.184401	-0.0560483	0.0348262	0.192989	0.137651	0.0306043	0.211556	-0.350148	0.247476	0.113591	0.339048	0.19305	0.217373	0.00925265	0.141684	-0.0688312	0.201706	0.12697	0.361796	0.562156	0.35587	0.0811658	0.0997112	-0.090779	-0.0569623	0.215401	0.217815	0.309243	0.155209	0.0783969	0.240176	-0.0593565	0.247178	0.0562936	-0.200738	-0.304107	-0.243459	-0.0868754	-0.187532	0.196648
TCGA-EK-A2RK-01A	0.0108947	0.0510144	0.197357	-0.352837	-0.0744824	-0.340927	-0.0838552	0.0514878	-0.0656132	-0.0547382	-0.230518	0.180432	-0.171691	-0.0161768	-0.0492676	-0.121058	-0.136628	0.424553	0.307183	-0.108575	0.0224816	0.000207532	0.0270858	0.0579918	-0.125732	0.0996254	-0.00422133	0.448144	0.417987	-0.394733	-0.0965764	0.282468	0.317432	0.36524	0.0435802	0.365915	0.0252942	0.0672038	-0.302349	-0.189643	-0.0386498	0.110649	-0.0209265	0.188697	0.19858	0.283281	0.195161	0.00352211	0.119695
TCGA-Q1-A5R1-01A	0.336579	-0.159899	-0.062654	-0.388781	-0.290613	-0.20006	-0.0319899	-0.121825	-0.48043	-0.0145286	-0.10374	0.031147	0.101107	0.115271	-0.106883	-0.1612	-0.127248	-0.414617	-0.328409	-0.260638	-0.00990445	-0.166662	-0.101923	-0.256814	-0.286831	-0.347191	-0.381497	-0.519258	-0.542875	-0.35968	-0.0714741	0.260038	0.15648	0.171335	-0.1001	0.00524718	-0.0332757	-0.0136124	-0.0844095	-0.116335	0.0049516	0.0611128	0.0369019	0.293857	0.249698	-0.250034	0.0735576	0.103105	-0.0298817
TCGA-VS-A9U5-01A	-0.26701	-0.301747	-0.204638	0.135714	-0.0152244	-0.444976	0.0184746	-0.096601	0.065128	-0.25502	-0.0805274	-0.123535	-0.0781859	-0.0819021	-0.147282	-0.269647	-0.310302	-0.234823	-0.0906326	-0.191193	-0.0789301	0.155961	-0.236034	-0.0630744	-0.120832	-0.258022	0.11935	-0.29662	0.287839	-0.509827	0.0157375	-0.187725	-0.179591	-0.187653	-0.136886	-0.280385	-0.217656	-0.209184	-0.113823	-0.290565	0.0932693	-0.271751	0.0519384	-0.0218589	-0.0686497	0.0734157	0.0450139	-0.149204	0.063872
TCGA-EA-A3QE-01A	0.368088	0.169377	-0.292418	-0.0710069	-0.0598255	0.0266725	0.508343	-0.47031	-0.428582	0.245607	0.0264173	-0.0805097	0.127378	0.141817	-0.115029	-0.0844346	-0.0426509	0.527067	0.566442	0.0348157	0.26892	0.0775399	0.364433	-0.323178	0.0635943	-0.0907261	-0.540191	-0.600312	-0.593733	-0.0367819	0.43252	0.114416	-0.0555342	-0.322144	-0.202003	-0.177958	0.195355	-0.0947652	0.133259	0.0251227	0.116795	0.245378	0.302593	0.0796998	-0.0138183	0.448148	-0.153836	0.285835	0.260219
TCGA-EA-A3HT-01A	0.555159	0.379044	0.062778	0.171878	-0.0106207	0.444595	0.368907	-0.412358	-0.149785	0.291779	0.180415	-0.17807	0.309321	0.17299	0.329884	0.30286	0.24358	-0.290983	-0.0826043	0.307168	0.338133	0.222906	0.339782	-0.113023	-0.048544	-0.0417592	-0.363484	-0.468886	-0.526432	0.584993	0.402937	0.00303288	-0.166403	-0.498672	0.0428437	-0.120456	0.247206	0.0177076	0.470776	0.457358	0.103416	0.403609	0.154983	-0.0475491	-0.0136871	0.0648071	-0.0677783	0.381911	0.110092
TCGA-IR-A3L7-01A	-0.552303	-0.282529	-0.192683	0.234835	0.00971605	-0.180194	-0.516283	0.0346948	0.164925	-0.261386	-0.0718718	0.0618862	0.152114	0.0306401	0.160913	-0.0838055	0.215465	-0.566596	-0.545351	-0.169914	-0.00494335	-0.145911	-0.451516	-0.384329	-0.200588	-0.350551	0.275696	-0.258341	-0.388925	-0.373421	-0.486897	-0.0021693	0.247169	0.175515	-0.104654	-0.300413	-0.146793	-0.309783	0.194926	-0.379329	-0.0188401	-0.349756	-0.425732	0.100173	0.258757	-0.598161	-0.0558984	-0.42023	0.0535644
TCGA-C5-A2LX-01A	0.311572	0.000630584	0.0582607	-0.452579	-0.205418	-0.282955	0.246745	0.253277	-0.302556	0.099922	-0.104801	-0.0993363	-0.290896	-0.0712388	-0.237033	0.108869	-0.499522	0.272117	0.259934	-0.0410342	0.0350662	-0.391445	0.0995882	-0.251813	-0.108611	-0.263717	-0.104868	0.14406	0.105966	0.198274	0.209802	-0.0385902	-0.0467911	0.154323	-0.161538	0.21049	0.0958188	0.0792976	-0.272084	0.0667582	-0.263095	0.185071	0.172152	-0.0799168	-0.202827	0.477858	0.0537559	0.12109	0.263367
TCGA-MU-A51Y-01A	-0.0910269	-0.0941422	0.125871	0.180356	0.0796729	-0.168851	0.19198	-0.33783	-0.348888	0.12668	0.0532713	0.0515791	0.110242	0.0687119	0.114683	0.155861	0.0324998	0.45933	0.447385	0.157294	0.218491	0.346793	0.290178	-0.242786	0.107219	-0.0903781	-0.379827	-0.547543	-0.555613	0.0821597	0.322058	0.103215	0.0318132	-0.36492	-0.188779	-0.299589	0.0252386	-0.105896	0.237566	-0.151252	0.0706411	0.169669	0.174967	0.0930797	-0.00932215	0.385333	-0.069153	0.178814	0.103982
TCGA-JX-A5QV-01A	0.0260532	0.155125	-0.0885807	-0.125177	0.290171	0.0691637	0.0893912	0.0603095	-0.102493	0.0527788	-0.190329	-0.0687652	0.0192004	0.127886	-0.193183	-0.0583961	-0.0531888	0.0155322	-0.0100717	-0.0385747	0.185606	0.288814	0.0378171	-0.0769157	0.0886003	-0.0265628	0.0928996	0.0819218	-0.135114	-0.164831	-0.0650067	0.0350267	-0.121747	-0.0415732	-0.00612982	0.20329	0.264352	0.0991066	-0.0324397	-0.404648	-0.0286028	-0.0379271	-0.0481825	-0.0810403	0.0461365	0.0588433	0.0776861	0.00972888	0.122675
TCGA-FU-A3HY-01A	0.0268526	0.208064	0.244216	0.366297	-0.0126333	0.343183	-0.234793	0.0680094	0.377424	0.0754713	-0.000947622	0.227969	0.26476	0.222631	0.339954	0.0131822	0.330263	-0.556084	-0.422055	0.117562	0.23085	-0.197107	-0.0602806	-0.0436134	0.172957	0.3836	0.369032	0.356372	0.196768	0.00968355	-0.133575	0.142619	0.240349	0.269946	0.243626	-0.00654363	0.195653	0.0286476	0.144853	-0.104257	0.162478	0.0374667	-0.100682	0.0510611	0.169576	-0.374816	0.135638	-0.0993397	0.152318
TCGA-MU-A8JM-01A	0.617625	0.419015	0.134476	0.0466769	0.329585	0.394918	0.415967	-0.277856	-0.0138816	0.401945	0.227191	-0.178248	0.394955	0.324433	0.274878	0.301608	-0.0187671	-0.371815	-0.0688435	0.344879	0.302117	0.475404	0.33943	0.14721	0.261405	0.256797	-0.0954831	0.00397264	-0.0149837	0.476035	0.456913	0.127867	-0.163563	-0.39194	-0.0352291	-0.0107761	0.350089	0.36315	0.29645	0.355577	0.180286	0.337225	0.426317	-0.188044	-0.236378	0.331148	-0.00843311	0.222991	0.262638
TCGA-C5-A3HL-01A	0.368412	0.45646	0.282545	0.327975	0.286378	0.432574	0.0452232	-0.257227	0.210818	0.227048	0.202252	-0.0848688	0.334151	0.336743	0.327551	0.0456922	0.2756	-0.405792	-0.17904	0.14031	0.294982	0.194437	-0.0694394	0.0656135	0.261338	0.310735	0.261319	-0.304917	-0.542483	0.323267	0.0767434	0.136056	0.00151647	-0.379406	0.298128	-0.0700637	0.308791	0.198491	0.387196	0.118965	0.225999	-0.0495733	0.000491338	0.118019	0.0483077	-0.311861	0.175603	-0.0694335	0.176347
TCGA-EK-A2RN-01A	0.191917	-0.0228968	-0.169394	-0.484614	-0.278793	-0.113421	0.0887142	-0.547547	-0.529872	-0.183558	0.00849336	-0.434592	0.0335908	0.118368	-0.242123	0.0333944	-0.405016	0.134327	0.0753517	-0.180286	0.0308616	0.267005	0.0472656	-0.568881	-0.372378	-0.490977	-0.606586	-0.660536	-0.612624	-0.0382691	0.183427	-0.112039	-0.309763	-0.600401	-0.341139	-0.179759	-0.0258006	-0.248654	-0.0744958	0.19	-0.249257	0.200758	-0.101724	-0.06716	-0.343182	-0.0156518	0.121834	0.223246	0.398557
TCGA-VS-A9UI-01A	-0.151171	-0.0268188	0.231129	0.0540882	-0.116216	-0.178629	0.017855	-0.286825	-0.318506	-0.0575918	0.00763594	-0.0108024	0.00401788	0.00422967	-0.0659195	-0.0943306	0.276225	0.481395	0.367055	0.110638	0.0984232	-0.0925256	-0.01723	-0.209241	0.168536	0.0447273	-0.443599	-0.424267	-0.392742	-0.505003	0.0353674	-0.0208233	0.124921	-0.306992	-0.125654	-0.180434	0.157766	-0.0449857	-0.306527	-0.425822	0.109178	-0.316846	-0.0261383	0.214212	0.147896	0.219734	-0.0991616	-0.123307	0.177241
TCGA-VS-A9UY-01A	0.37472	-0.00961768	0.0707332	0.321713	0.000252675	0.481866	0.524008	-0.057896	0.293561	0.179431	-0.266936	0.0277152	0.0274951	-0.0397503	0.083132	-0.353436	0.427042	0.646174	0.514879	-0.13569	-0.204948	-0.104989	0.175241	0.195146	0.358279	0.26721	0.197687	-0.0400328	0.0184575	-0.319159	0.364534	-0.0941353	-0.18022	-0.298108	-0.094547	-0.241566	0.245131	0.0609672	0.0997457	-0.0235444	0.16182	0.0132715	0.240865	-0.182304	-0.094338	0.167998	-0.209642	0.125508	-0.21053
TCGA-C5-A1MF-01A	-0.147318	0.03879	0.0934877	-0.516328	-0.206635	-0.389371	-0.175378	0.0305105	-0.364023	-0.120682	0.214659	0.00905737	0.0507065	0.135954	-0.238774	0.349397	-0.486714	-0.0623589	-0.0515782	0.0167426	0.0914115	-0.232724	0.00703936	-0.209221	-0.246286	-0.208648	-0.176043	0.235437	0.428927	0.278021	0.037957	0.0285648	-0.0558503	0.292095	0.0129718	0.366887	-0.0886094	0.112204	-0.30593	0.0227655	-0.237477	0.231237	0.0408876	0.0105852	-0.00929582	0.175057	0.206087	0.148717	0.307126
TCGA-VS-A9UL-01A	-0.528582	-0.123289	-0.137097	0.41406	-0.0429881	-0.151791	-0.533311	-0.0350417	0.452497	-0.342187	-0.247995	-0.333665	-0.271255	-0.271226	-0.0581648	-0.113517	0.0626356	-0.699978	-0.641673	-0.148217	-0.296355	0.0564533	-0.449799	0.182442	-0.0247628	0.0550633	0.475899	-0.126152	-0.425041	-0.153457	-0.553958	-0.373169	-0.285628	-0.415284	0.0771912	-0.41156	-0.391763	-0.234956	0.0358441	-0.227725	-0.0464352	-0.36372	-0.375265	-0.147116	-0.241787	-0.626217	0.203549	-0.318448	-0.0967431
TCGA-ZJ-A8QQ-01A	0.18068	0.117713	0.0907396	0.0185728	-0.0291576	-0.0097369	0.0487511	0.187523	0.0421383	0.044962	-0.345683	0.0192014	-0.0786691	-0.0565872	-0.0794781	-0.201212	0.0962343	0.521056	0.298721	0.0394725	-0.249456	0.0815527	-0.0345975	0.10533	-0.140303	0.117989	-0.0374384	0.32351	0.441872	-0.316291	0.0217169	-0.0475383	-0.0681609	0.119302	-0.042089	-0.22627	0.167191	0.0970669	-0.248198	-0.0892853	0.166917	0.0666984	-0.122814	-0.161092	-0.02949	-0.167382	-0.0453205	-0.275594	0.0703725
TCGA-C5-A8XI-01A	0.526876	0.178974	0.190011	-0.0176436	0.425627	0.395315	0.364713	-0.00928201	-0.229204	0.2888	0.0319279	-0.153959	-0.0104209	-0.0630145	0.207532	0.0486477	-0.0676569	0.616673	0.479679	0.0873565	0.368477	0.299287	0.110645	0.175777	0.0729378	0.0215885	-0.136708	-0.217287	-0.0520793	0.240144	0.302714	0.0393609	0.02142	-0.112236	-0.0931356	0.120357	0.253671	0.0614609	0.150635	0.151367	0.101649	-0.0389079	0.345077	-0.0696673	0.0605569	0.208408	-0.125037	0.186723	0.118971
TCGA-EA-A5ZF-01A	-0.465314	-0.180227	0.167217	0.13852	-0.241373	-0.103123	-0.366335	0.227254	0.337363	-0.234654	0.094424	-0.000665194	-0.189669	-0.118246	0.186265	0.044874	0.326587	-0.589074	-0.530203	-0.189501	-0.272807	0.0523186	-0.301234	0.0446032	-0.06338	0.103969	0.404286	0.171564	-0.0699179	0.254547	-0.375982	0.106389	0.166063	-0.0795289	0.116864	-0.104991	-0.363109	-0.123712	0.227927	-0.110604	-0.0152103	-0.229952	-0.303182	0.232383	0.209009	-0.534711	0.250338	-0.194065	-0.270453
TCGA-IR-A3LC-01A	0.256557	-0.052755	-0.202617	0.102095	0.0743252	0.236843	-0.181794	0.314851	0.293998	0.105348	-0.111668	0.190407	0.207353	0.230556	-0.147943	-0.121855	0.027938	-0.252984	-0.230562	-0.116473	-0.0375051	-0.0340352	-0.174943	0.273761	0.189352	0.0787648	0.395244	0.423171	0.507603	-0.232417	-0.0946746	0.142455	0.105043	0.34438	0.141272	0.23511	0.254579	0.100015	0.0629329	-0.0943486	-0.0341258	-0.205769	-0.200771	-0.0893246	0.112842	-0.24338	0.171245	-0.164647	-0.195638
TCGA-C5-A1BK-01B	0.385071	-0.17649	-0.0117031	-0.467582	-0.291499	-0.322616	0.411634	-0.27315	-0.502303	0.155343	-0.296995	-0.250917	0.110762	0.150925	-0.208443	0.214522	-0.444215	0.625219	0.588855	0.0655731	-0.0370667	-0.0734051	0.3886	-0.143598	-0.0753698	-0.247625	-0.515044	-0.404905	-0.186406	-0.0960274	0.419272	0.17203	-0.0791798	-0.228971	-0.317112	0.172333	0.279299	0.0564074	-0.143355	-0.264872	-0.0264151	0.350783	0.265897	-0.0108395	-0.142605	0.61032	-0.18016	0.2062	0.240009
TCGA-DR-A0ZM-01A	-0.00900479	-0.105148	-0.201648	-0.51908	-0.214392	-0.403733	0.366948	-0.428173	-0.616472	0.0399902	-0.214111	-0.161952	-0.0188648	0.0324183	-0.263981	0.119674	-0.36466	0.693199	0.555761	0.0946682	0.173367	0.0839001	0.217773	-0.441099	-0.183642	-0.348949	-0.725531	-0.528514	-0.444211	-0.0198632	0.296933	0.118942	-0.0336426	-0.228846	-0.228612	0.00868978	0.0732124	-0.189041	-0.266129	0.245172	-0.179762	0.216296	0.193084	0.173778	-0.0196988	0.529003	-0.170354	0.265072	0.324096
TCGA-VS-A8EB-01A	0.193456	0.276403	0.0758317	0.0500683	-0.0332872	0.234075	0.137326	0.133569	0.266953	0.00112721	0.0791157	0.00589157	-0.120121	-0.0980244	-0.00513785	-0.0433786	0.118873	-0.295532	-0.123928	0.0553636	0.0889742	-0.144052	-0.0585439	0.222229	-0.036113	0.174285	0.316239	0.430728	0.535782	0.279423	-0.0564284	-0.185013	-0.0819827	-0.0479196	0.163154	-0.0654483	-0.0476292	0.168009	0.0399145	-0.0283844	-0.0666162	-0.13765	0.00341132	-0.193246	0.0379017	0.128617	0.0933204	-0.239892	-0.0907984
TCGA-VS-A94Y-01A	0.408088	0.396619	0.161508	0.0240743	0.160978	0.426219	0.267245	-0.249669	-0.308501	0.308091	0.237424	0.0959361	0.259132	0.163402	0.204535	0.15366	0.389504	-0.323548	-0.0424464	0.378506	0.148011	0.267303	0.280709	0.0890064	0.109793	0.234063	-0.444518	-0.252843	-0.382577	0.52516	0.277023	0.154231	-0.161559	-0.316421	0.398839	-0.0101139	0.0962878	0.151728	0.221097	0.470455	0.165232	0.397567	0.178688	-0.125977	0.0848567	-0.0467439	-0.0690338	0.277367	-0.125546
TCGA-VS-A9UU-01A	-0.160916	-0.0182208	0.0322704	-0.24048	0.0885296	-0.251709	-0.166871	-0.116561	-0.197412	-0.173552	-0.132713	-0.166923	0.0595174	0.100991	-0.219892	0.0153862	-0.315077	-0.220226	-0.201991	0.0103868	-0.022502	0.267851	-0.271284	0.0399966	-0.201807	-0.0589565	-0.21214	0.0054692	0.355104	-0.317212	-0.136669	-0.000740332	0.0641099	-0.145142	-0.149264	-0.236743	0.146702	-0.0178644	-0.255113	-0.264139	0.0585362	-0.221318	-0.161671	-0.0691891	0.0211812	-0.32705	0.0285904	-0.225276	0.274077
TCGA-C5-A1M8-01A	-0.412428	-0.0479241	-0.050887	-0.0737398	-0.1683	-0.197489	-0.505115	0.304652	0.320349	-0.321614	-0.207981	-0.0433722	-0.234934	0.00917957	-0.34019	0.148963	-0.339113	-0.583343	-0.547174	-0.181235	-0.310787	-0.240163	-0.377591	-0.0787079	-0.168144	-0.162865	0.477382	0.331697	-0.0240163	-0.35523	-0.46868	-0.0261181	0.116853	0.312939	-0.0766794	-0.0574309	0.0524333	-0.0804739	-0.294932	-0.429615	-0.196928	-0.169524	-0.392998	-0.0218069	-0.0526454	-0.482763	0.239582	-0.41625	0.144204
TCGA-DS-A7WH-01A	0.448478	0.149679	-0.0108684	0.407469	0.163101	0.539871	0.212553	-0.292517	0.111982	0.105294	0.0510835	-0.209493	0.253117	0.0748325	0.358598	0.326364	0.20516	-0.521085	-0.304004	0.277698	-0.0214467	0.218605	0.146308	-0.0479259	0.0572581	-0.171976	-0.0139449	-0.348515	-0.367302	0.54572	0.208991	0.0188064	-0.334278	-0.509359	-0.127266	-0.126607	-0.0702394	-0.0658621	0.48208	0.468835	-0.0484892	0.253166	0.253482	-0.129318	-0.209475	-0.247761	-0.0211325	0.321669	-0.079691
TCGA-IR-A3LI-01A	-0.257802	0.190683	0.0533948	-0.44698	-0.329138	-0.425439	-0.397623	-0.240879	-0.543263	-0.202574	-0.163469	0.0636014	0.166577	0.181028	-0.0377842	0.0995422	-0.211115	-0.297768	-0.390418	-0.19563	-0.000623001	0.0222612	-0.277798	-0.308267	-0.281322	-0.249445	-0.553684	-0.522527	-0.603356	-0.32146	-0.390822	0.152919	0.128826	0.0693798	0.316979	0.191177	-0.102014	0.0819805	-0.278024	-0.277574	-0.134779	-0.124376	-0.245822	0.345814	0.20949	-0.468898	0.112796	-0.13763	0.323834
TCGA-DR-A0ZL-01A	-0.0913175	-0.0850721	0.074909	0.169759	-0.189785	-0.0749989	-0.32904	0.181368	0.319599	-0.267031	-0.206915	-0.140981	0.00587069	-0.108237	0.240596	-0.154562	-0.197712	-0.580663	-0.504903	-0.0653645	-0.00895213	-0.0303661	-0.334801	-0.128608	-0.0790007	0.0318572	0.290401	0.243858	0.471397	-0.391875	-0.273099	-0.193312	-0.196296	-0.10791	-0.000875701	0.0848654	-0.075539	-0.0559395	-0.12378	-0.352343	0.00290757	-0.288423	-0.204388	-0.0528874	0.059823	-0.425423	0.201313	-0.313904	0.0614301
TCGA-DS-A0VK-01A	-0.104493	0.00815839	0.212406	-0.131911	0.186453	0.463977	-0.225325	0.17248	-0.241846	0.0451783	0.213558	0.245535	0.162626	0.0142462	0.33252	0.20635	0.263555	-0.594749	-0.509248	0.192694	0.188903	0.0288594	-0.140653	0.0633085	0.0326532	0.103501	-0.25015	-0.102382	-0.0472192	0.288075	-0.165226	0.195901	0.0794779	0.0898888	0.113977	0.390052	0.212776	0.13806	0.343579	0.2514	0.245564	0.118194	-0.0429405	0.229411	0.23431	-0.484582	-0.118386	-0.194446	-0.109115
TCGA-IR-A3LL-01A	0.267977	0.056717	-0.0829829	-0.410152	-0.308696	-0.341429	0.418013	-0.266775	-0.424957	0.0603002	-0.271524	-0.218642	-0.186898	0.0225304	-0.354707	-0.0857451	-0.343815	0.637111	0.581004	-0.0864986	0.184324	0.198481	0.283578	-0.285262	-0.181562	-0.0527895	-0.41078	-0.29017	0.0575585	-0.252519	0.409968	0.0472008	-0.167813	-0.111089	-0.188964	0.120893	0.111819	0.0680975	-0.274576	-0.00209801	-0.173151	0.138282	0.292955	-0.030492	-0.153879	0.565227	0.0672004	0.128709	0.262932
TCGA-HM-A3JJ-01A	0.038915	-0.113983	-0.177568	0.0867722	0.0462571	0.296693	0.26573	-0.0323835	-0.316322	0.179552	0.255768	-0.0601011	0.159458	0.13737	-0.116664	0.263128	0.103995	0.535424	0.434217	0.33239	0.283478	-0.22268	0.284479	-0.324509	0.13894	-0.29418	-0.326032	-0.256649	-0.395642	0.541865	0.320517	0.0274319	-0.0956676	-0.35855	-0.172518	-0.109531	0.224152	-0.177357	0.289855	0.252131	-0.0388936	0.33052	0.0953467	-0.00298739	-0.029308	0.25742	-0.245669	0.168362	0.0535378
TCGA-EK-A2RJ-01A	0.421482	0.215334	-0.0287783	-0.357086	-0.248734	0.08218	0.296357	-0.355526	-0.426966	-0.0660648	-0.237826	-0.000687183	0.169212	-0.0383887	-0.0181763	-0.0844024	0.25807	0.296013	0.403825	-0.0755529	-0.0779736	-0.0383783	0.33863	0.150094	0.160951	-0.0268482	-0.530332	-0.304984	-0.150109	0.0915396	0.321007	-0.0780106	-0.232464	-0.215597	0.0219822	-0.167931	-0.0222324	-0.10015	-0.136516	0.206961	0.0523181	0.248183	0.147314	0.0722456	-0.046172	0.353824	-0.0855075	0.189987	-0.0360148
TCGA-FU-A3TQ-01A	0.442438	0.246678	-0.061213	0.186752	0.13557	0.324886	0.167927	-0.251342	0.107805	0.279386	0.00880594	-0.0826104	0.0308459	0.12797	0.230734	-0.037367	-0.08223	-0.324417	-0.149902	0.120259	0.253672	0.249773	0.134595	-0.218228	0.197281	0.0777284	-0.0805599	-0.28318	-0.449854	0.259916	0.2673	0.120336	0.0809942	-0.284835	0.00904219	-0.0480471	0.214402	0.0185081	0.198658	-0.0735588	0.0465333	0.132548	0.174467	-0.0504144	0.0682533	0.0674115	0.080506	0.229414	0.164202
TCGA-DG-A2KL-01A	0.467028	0.375378	0.181876	0.228036	0.186833	0.360355	0.320982	-0.324191	0.106365	0.285189	0.175481	-0.0906958	0.168243	0.0855485	0.266396	0.256781	0.266892	-0.183602	0.137197	0.393958	0.400607	0.366275	0.244122	-0.154947	0.259296	0.173044	-0.00181111	-0.284895	-0.606542	0.621493	0.388583	0.0375105	-0.0695302	-0.275145	0.0567677	-0.298793	0.265636	-0.0486145	0.481357	0.459851	0.0509876	0.239031	0.247484	-0.311732	-0.260471	0.199943	-0.169609	0.351283	-0.040658
TCGA-EA-A5O9-01A	0.158084	0.228864	0.0166048	-0.0666186	-0.323096	-0.0725783	0.0481069	0.369916	0.371175	0.157507	-0.0939557	0.0938861	0.0108005	0.156075	-0.0430418	-0.147835	0.122596	0.626638	0.379393	-0.324362	-0.36754	-0.381647	-0.000298672	0.337934	0.0644487	0.172934	0.476588	0.517365	0.536826	-0.393417	0.00709327	-0.10107	0.0220938	0.423784	0.185255	0.215293	0.286902	0.41824	-0.322781	-0.49444	0.057856	-0.0679062	-0.0426932	-0.148391	0.14002	0.0158009	0.0497694	-0.326932	-0.0678145
TCGA-LP-A5U2-01A	-0.440021	-0.293328	-0.213712	-0.0941498	-0.0852529	-0.473547	-0.434782	0.367486	0.423807	-0.190218	-0.241493	0.231843	-0.186744	-0.132023	-0.11759	-0.193418	0.0605822	-0.0942854	-0.273744	-0.42021	-0.421782	-0.40838	-0.423004	0.46343	0.0244378	0.363094	0.543957	0.697584	0.802604	-0.523638	-0.443826	-0.263578	0.130077	0.444739	-0.118767	0.188168	-0.108087	0.152476	-0.397889	-0.506803	-0.144622	-0.490513	-0.211982	-0.173715	0.0305963	-0.163477	0.195561	-0.387037	-0.226028
TCGA-JW-A5VG-01A	0.364709	0.0158402	-0.354234	0.350635	-0.00885098	0.25664	0.254472	0.161293	0.477311	0.125775	-0.121619	-0.283618	-0.177814	-0.213411	0.173266	-0.131378	0.0363095	0.640457	0.495895	0.0146504	-0.0116421	-0.241652	0.128186	0.314292	0.134465	0.0970625	0.398062	0.428743	0.423702	0.018419	0.207951	-0.266242	-0.314744	-0.0307004	-0.0770074	-0.17595	0.192032	0.0264703	0.0981845	0.113812	-0.0448936	-0.00867851	0.0505129	-0.310407	-0.254666	0.277188	-0.0117283	-0.0991546	-0.184714
TCGA-ZJ-AAX4-01A	-0.350126	-0.327851	-0.303975	0.102406	-0.122167	-0.317234	-0.0988597	-0.206494	0.116952	-0.238341	0.151581	-0.214579	-0.24639	-0.117465	-0.445577	-0.0176627	-0.241873	-0.30527	-0.240692	-0.122346	-0.149655	-0.0558202	-0.0232323	-0.36237	-0.112481	-0.308893	-0.0153112	-0.385232	-0.530638	-0.390597	-0.0104462	-0.046897	-0.0976168	-0.333349	-0.353365	-0.28504	0.0253989	-0.240232	-0.230166	-0.235476	-0.182873	0.00465536	-0.112746	-0.113948	-0.130393	0.180074	-0.0773449	0.0717704	0.00559936
TCGA-EA-A3HU-01A	0.25984	0.301635	-0.231575	0.248766	0.0468589	0.00723226	0.387191	-0.121443	0.256225	0.192312	-0.000947045	-0.0378021	-0.195701	-0.0961486	-0.176141	-0.350247	0.408477	0.67867	0.610743	0.130742	0.0897333	-0.247665	0.293128	0.0407623	0.415089	0.187336	0.228876	-0.197198	-0.476881	-0.108918	0.346789	-0.132017	0.00122112	0.129711	0.121011	0.277371	0.20851	0.0590812	-0.0898467	-0.246598	0.165262	-0.0690157	0.217569	-0.0713251	0.0570817	0.496036	-0.0153092	0.188969	-0.0273856
TCGA-R2-A69V-01A	0.391916	0.134504	0.122118	-0.534139	-0.312881	-0.264189	0.519689	-0.171089	-0.550124	0.161338	-0.188995	0.157857	0.0971342	0.112653	-0.0537417	0.265992	-0.271202	0.470874	0.556222	0.0722541	0.109338	0.0325994	0.472088	-0.232498	-0.178194	-0.0387577	-0.549787	-0.0519501	-0.0229073	0.255143	0.549718	0.311496	0.0435926	0.180012	-0.12478	0.292304	0.105679	0.168322	-0.160705	0.379336	-0.125596	0.423909	0.431887	0.0450812	0.076083	0.621878	-0.0366376	0.351023	0.29251
TCGA-DG-A2KM-01A	0.333559	0.0695542	-0.0788326	-0.212452	-0.119184	-0.156803	0.488216	-0.396989	-0.515953	0.271747	-0.152223	-0.107551	0.0699027	-0.0626634	-0.0155746	0.0937375	-0.0810654	0.565868	0.604829	0.0708977	0.116675	0.0849745	0.455448	-0.300462	0.100772	-0.150916	-0.569864	-0.603224	-0.663261	0.175816	0.502262	0.16084	-0.15876	-0.307732	-0.25108	0.0868898	0.0964512	-0.0374207	0.12935	-0.0735796	0.0763488	0.246839	0.37043	0.217173	0.0452485	0.59755	-0.106021	0.337358	0.238987
TCGA-EX-A69L-01A	0.259701	-0.027447	-0.146115	-0.177093	-0.0444574	-0.190604	0.441332	0.238826	-0.0621356	0.236277	-0.266703	0.244728	0.0240234	0.0917573	-0.0497411	0.0743461	0.189625	0.570914	0.613338	0.13319	-0.00479284	-0.177318	0.38402	-0.0397122	0.159442	0.15484	0.00940781	0.140978	-0.440071	0.0788337	0.465915	0.132327	0.270722	0.422009	-0.0161932	0.197041	0.168241	0.191423	-0.0522811	-0.0163306	0.22714	0.299279	0.101835	0.0789457	0.198259	0.554772	0.0430696	0.236035	0.0794054
TCGA-UC-A7PF-01A	-0.00350259	0.183128	-0.302102	0.216914	-0.0171688	-0.0474415	0.317191	-0.258865	-0.0703013	0.122976	-0.00462001	-0.105978	-0.124462	-0.117721	-0.217681	0.0664262	-0.231237	0.526098	0.511711	0.143661	0.258776	0.146026	0.258582	-0.305598	0.0330612	-0.294484	-0.111644	-0.311064	-0.308603	0.259268	0.203317	0.181795	-0.0591404	-0.0605851	-0.0543874	0.0410207	-0.0455395	-0.157089	0.0234099	0.076862	-0.0793066	0.21931	0.183843	0.0255611	-0.200338	0.48084	-0.0757834	0.174701	0.150249
TCGA-VS-A8EG-01A	-0.105649	0.124364	0.373726	0.472967	0.179369	0.123631	-0.307624	-0.155012	0.458567	0.0150816	-0.133464	0.164167	0.241279	0.251301	0.291227	-0.0376437	-0.0290962	-0.423992	-0.34431	-0.0642296	0.257095	0.0735508	-0.083607	0.0122598	0.169688	0.227413	0.42597	-0.157201	-0.237691	-0.441288	-0.175753	0.0857022	0.212001	-0.201037	0.109829	-0.0855365	0.0805339	0.19289	0.0417573	-0.391246	0.221014	0.0054055	-0.089482	0.266141	0.174791	-0.351179	0.205597	-0.260414	0.0686293
TCGA, The Cancer Genome Atlas; GSVA, Gene Set Variation Analysis.
[truncated: 1 more columns]
